## RESEARCH ARTICLE

## Ancient multiplicity in cyclic nucleotide-gated (CNG) cation channel repertoire was reduced in the ancestor of Olfactores before re-expansion by whole genome duplications in vertebrates

David Lagman<sup>1\*</sup>, Helen J. Haines, Xesús M. Abalo<sup>2</sup>, Dan Larhammar<sup>1</sup> Science for Life Laboratory, Department of Medical Cell Biology, Biomedical Centre, Uppsala University, Uppsala, Sweden<sup>2</sup> Current address: Science for Life Laboratory, Department of Gene Technology, KTH Royal Institute of Technology, Uppsala, Sweden\* [david.lagman@neuro.uu.se](mailto:david.lagman@neuro.uu.se)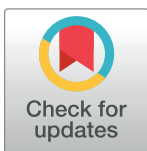

## OPEN ACCESS

**Citation:** Lagman D, Haines HJ, Abalo XM, Larhammar D (2022) Ancient multiplicity in cyclic nucleotide-gated (CNG) cation channel repertoire was reduced in the ancestor of Olfactores before re-expansion by whole genome duplications in vertebrates. PLoS ONE 17(12): e0279548. <https://doi.org/10.1371/journal.pone.0279548>

**Editor:** Hector Escriva, Laboratoire Arago, FRANCE

**Received:** September 29, 2022

**Accepted:** December 9, 2022

**Published:** December 30, 2022

**Peer Review History:** PLOS recognizes the benefits of transparency in the peer review process; therefore, we enable the publication of all of the content of peer review and author responses alongside final, published articles. The editorial history of this article is available here: <https://doi.org/10.1371/journal.pone.0279548>

**Copyright:** © 2022 Lagman et al. This is an open access article distributed under the terms of the [Creative Commons Attribution License](https://creativecommons.org/licenses/by/4.0/), which permits unrestricted use, distribution, and reproduction in any medium, provided the original author and source are credited.

**Data Availability Statement:** The multiple sequence alignments and tree files in Newick format has been deposited in FigShare and is

## Abstract

Cyclic nucleotide-gated (CNG) cation channels are important heterotetrameric proteins in the retina, with different subunit composition in cone and rod photoreceptor cells: three *CNGA3* and one *CNGB3* in cones and three *CNGA1* and one *CNGB1* in rods. *CNGA* and *CNGB* subunits form separate subfamilies. We have analyzed the evolution of the CNG gene family in metazoans, with special focus on vertebrates by using sequence-based phylogeny and conservation of chromosomal synteny to deduce paralogs resulting from the early vertebrate whole genome duplications (WGDs). Our analyses show, unexpectedly, that the *CNGA* subfamily had four sister subfamilies in the ancestor of bilaterians and cnidarians that we named *CNGC*, *CNGD*, *CNGE* and *CNGF*. Of these, *CNGC*, *CNGE* and *CNGF* were lost in the ancestor of Olfactores while *CNGD* was lost in the vertebrate ancestor. The remaining *CNGA* and *CNGB* genes were expanded by a local duplication of *CNGA* and the subsequent chromosome duplications in the basal vertebrate WGD events. Upon some losses, this resulted in the gnathostome ancestor having three members in the visual *CNGA* subfamily (*CNGA1-3*), a single *CNGA4* gene, and two members in the *CNGB* subfamily (*CNGB1* and *CNGB3*). The nature of chromosomal rearrangements in the vertebrate *CNGA* paralogon was resolved by including the genomes of a non-teleost actinopterygian and an elasmobranch. After the teleost-specific WGD, additional duplicates were generated and retained for *CNGA1*, *CNGA2*, *CNGA3* and *CNGB1*. Furthermore, teleosts retain a local duplicate of *CNGB3*. The retention of duplicated CNG genes is explained by their subfunctionalisation and photoreceptor-specific expression. In conclusion, this study provides evidence for four previously unknown CNG subfamilies in metazoans and further evidence that the early vertebrate WGD events were instrumental in the evolution of the vertebrate visual and central nervous systems.

available through the DOI: [10.6084/m9.figshare.c.6170824.v1](https://doi.org/10.6084/m9.figshare.c.6170824.v1).

**Funding:** This work was supported by two grants to DLar from Vetenskapsrådet (C0452101) and Carl Tryggers Stiftelse för Vetenskaplig Forskning (CTS 09:210) (<https://www.vr.se> and <https://www.carltryggersstiftelse.se> respectively) and one grant to XMA from Stiftelsen Olle Engkvist Byggmästare (468163019) (<https://engkviststiftelserna.se>). The funders had no role in study design, data collection and analysis, decision to publish, or preparation of the manuscript.

**Competing interests:** The authors have declared that no competing interests exist.

## Introduction

The evolution of the vertebrate eye has captivated the minds of biologists since the early days of evolutionary research [1]. Modern advances in genomics and transcriptomics have helped better understand the molecular underpinnings of vision evolution. Vertebrates have two major categories of photoreceptor cells in their retinae: the cones and the rods. Both cell types use related but distinct signal pathway proteins encoded by genes of several gene families. The discovery that the common ancestor of vertebrates had undergone two rounds (1R and 2R) of whole genome duplication (WGD) somewhere around the split between gnathostomes and cyclostomes led us to hypothesize, and later demonstrate, that many of the gene families encoding the signaling components of the vertebrate phototransduction cascade expanded during these events [2,3], namely the visual opsins [4], transducins [5,6] and phosphodiesterase 6 (PDE6) [7,8]. Additionally, we have shown that the third WGD (3R), in the teleost fish ancestor [9–12], led to further specializations in the teleost eyes [6–8]. Phylogenetic analyses of other components of all steps of the activation of the vertebrate phototransduction cascade have provided further support for 2R as a major contributor of the molecular machinery used for vision in cones and rods [13,14]. These data also lend support to previous studies indicating that rod photoreception is newer than cone photoreception [15], since rhodopsin first arose after 2R [4]. This all has been summarized in recent reviews [13,16,17].

In this work, we performed a thorough analysis of the phylogenetic history of the cyclic nucleotide-gated (CNG) cation channels in metazoans. These heterotetrametric channels, located on the cell membrane of the outer segments of vertebrate photoreceptor cells, play an essential role in phototransduction. In darkness high intracellular levels of cGMP keep the CNG channels open, maintaining a  $\text{Na}^+$  influx that keeps the photoreceptor cells depolarized and  $\text{Ca}^{2+}$  influx that regulates phototransduction proteins. When light activates the cascade, there is a reduction in cGMP levels and a subsequent hyperpolarization of the photoreceptor cell. In vertebrates, just as cones and rods express different opsins, transducin subunits [6,18] and PDE6 subunits [7], different CNG subunits are used to form the functional channels: cones use three CNGA3 subunits and one CNGB3 subunit (previously thought to be two of each of the cone-specific subunits) while rods use three CNGA1 subunits and one CNGB1 subunit [19]. The formation of the functional channel is facilitated by a C-terminal leucine zipper domain of cyclic nucleotide-gated channels (CLZ) of the CNGA subunits [20].

Besides being used in the visual system, CNG channels are also involved in olfaction, with olfactory receptor heterotetramers consisting of two CNGA2 subunits, one CNGA4 subunit and one CNGB1 subunit, where CNGA4 mainly has a modulatory role [21,22]. For a summary of CNG structure and function see [23].

Putative homologs of vertebrate CNG genes have been identified in prokaryotes [24] suggesting an origin very early in evolution. The signaling cascade utilizing an opsin, G-protein of the  $\text{G}\alpha_{i/t}$  family, PDE and CNG channel is called a ciliary phototransduction and previous studies have suggested that it preceded the appearance of bilaterians [25]. In non-vertebrate metazoans CNG channels are used in the phototransduction signal cascades together with opsins and arrestins. Examples of this signal cascade can be found in the neural cells that regulate cnidocytes in the hydra (*Hydra vulgaris* (*magnipapillata*)) [26]; in the eyes, antennae and brain of *Drosophila melanogaster* [27]; in the photosensitive neural subtypes in the anterior nervous system in the annelid *Platynereis dumerilii* [28]; and in the ciliated anterior apical trunk epidermal neurons expressing GnRH (that are likely chemosensory) in the larval stage of the tunicate *Ciona intestinalis* [29]. It has also been speculated that the amphioxus frontal eye uses a CNG channel in its photoreceptors [14], but no expression data have been published.

Extant vertebrates typically have six genes encoding CNGs, excluding lineage-specific duplications or losses: *CNGA1-4*, *CNGB1* and *CNGB3* (*CNGB2* has been renamed *CNGA4*). These genes belong to two distinct and distantly related subfamilies, *CNGA* and *CNGB*, within the CNG family [2,3]. When our initial evolutionary studies were performed, only human genomic information was available for analyses of conserved synteny [2]. Consequently, it was not possible to attribute the CNG gene duplications to 2R with certainty. This was probably due to translocations that appeared to conceal the paralogon, i.e., a quartet of related chromosomal regions [2,3]. Later studies, based on phylogeny of the CNG gene family, suggested that a local duplication of an ancestral *CNGA1/2/3* gene took place before the protostome-deuterostome split, resulting in *CNGA4*. Later the 2R duplications resulted in *CNGA1-3* in extant vertebrates. Duplication of the ancestral *CNGB* gene in 2R and subsequent losses resulted in *CNGB1* and *CNGB3* (see Lamb [13] and references therein). However, these later studies lacked detailed analysis of conserved synteny for neighbors of all the CNG genes that could resolve any chromosomal rearrangements that have previously shrouded the picture.

Knowledge about the evolutionary history of the genes involved in vision provides a better understanding of the origin and development of complex organs in vertebrates. For example, investigations into the cause of the high prevalence of achromatopsia in the population residing on the atoll of Pingelap in Micronesia (about 5%) resulted in the identification of the causative mutation (in a locus named *ACHM3*) and the identification of the cone specific *CNGB3* [30,31]. This atoll and its residents were described by the famous neurologist Oliver Sacks in his book "The island of the colorblind" [32]. Up to 90% of achromatopsia cases are due to mutations in *CNGA3* or *CNGB3* with approximately 100 mutations described in each of these genes [33,34].

Here, through extensive searches in metazoans we identified four previously unknown CNG genes that were present in the ancestor of bilaterians and cnidarians. Additionally, we took advantage of a broad repertoire of vertebrate species with high-coverage chromosome scale genome assemblies for detailed phylogenetic and conserved synteny analyses to see if we could disentangle the evolutionary history of the vertebrate CNG genes. We observed that conservation of synteny in vertebrates has been disrupted by chromosomal rearrangements, but in different ways in the different evolutionary lineages. By combining data from these lineages, we can now conclude that the cone-specific and rod-specific *CNGA* and *CNGB* subunit genes did indeed arise in the basal vertebrate WGDs, re-expanding the gene counts to numbers like the bilaterian and cnidarian ancestor. Additionally, by also investigating the CNG sequence repertoire in actinopterygians, a lineage having a wide range of visual opsin gene repertoires due to life in diverse visual environments [35], we can conclude that most surviving gene duplicates of the CNG subfamilies are the result of WGDs, while local duplications have been kept to a minimum. Taken together, our results provide further support that the vertebrate WGD events have made major contributions to the molecular machinery used for vision in cones and rods.

## Results

### The early origin of the *CNGA* and *CNGB* genes reveals unexpected multiplicity

The vertebrate genes encoding the CNG subunits form a family that has previously been subdivided into two subfamilies, *CNGA* and *CNGB*, originating in Bilateria before the protostome-deuterostome divergence [2,3,14]. Here, we attempted to date this duplication by performing extensive searches in eukaryotes. Our analyses suggest that there was a *CNGA* and a *CNGB* type gene before the radiation of metazoans, as shown by our BLASTP searches in non-

metazoan eukaryotes where we identified many sequences that have human *CNGA* and *CNGB* sequences as best reciprocal BLASTP hits (2252 versus 73 respectively). However, none of the putative *CNGA* sequences outside of metazoans have the CLZ domain when running hmmscan against PfamA with standard settings. When using the criteria of conserved domain architecture, we can date the duplication of *CNGA* and *CNGB* to at least the early metazoan ancestors, since we identified sequences with the same domain architecture as human *CNGA*, as well as human *CNGB* in the sponge, *Amphimedon queenslandica* (Figs 1–3).

We identified five *CNGA* type gene clades and we propose a naming for these five clades:—*CNGA* (named upon traditional *CNGA* sequences) in which most genes have a CLZ domain and containing representative sequences of vertebrates and sponges;—*CNGC* present in both Ctenophore, Cnidaria and some Bilateria clades;—*CNGD* which is found in most of metazoans except in sponges and placozoans;—*CNGE* which is only found in cnidarians;—*CNGF* which is present in protostomes and cnidarians but which have been lost in deuterostomes (Figs 1 and 3). Only 29 species of non-cnidarians have more than the four identified *CNGA* type genes. Out of these, with some exceptions, the majority are either rotifers (seven species) or chelicerids (five species). The animals with the largest number of *CNGA* type genes are tardigrades with nine genes.

Previous studies have suggested that the duplication that gave rise to *CNGA4* and the ancestral *CNGA1/2/3* occurred before the protostome-deuterostome split [13,14,36]. However, our phylogenetic analyses with a broader representation of taxa clearly place the local gene duplication that generated *CNGA4* and *CNGA1/2/3* in the vertebrate predecessor after it diverged from the tunicate ancestor (Figs 1 and 4). Tunicates, lancelets, and echinoderms all have *CNGA* sequence(s) that with high support branch off earlier than the vertebrate sequences (Figs 1 and 4). Most likely the previous results were due to the substitution model used and/or the higher evolutionary rate of *CNGA4* as compared to *CNGA1-3*, as well as the tunicate *CNGA* (Fig 4).

We were only able to identify one original member of the *CNGB* family (Fig 2) and most species only have a single gene: out of 271 non-vertebrate metazoans, only 44 have more than one and most of these species have two. Ten species have three or four *CNGB* genes. Again, tardigrades have the largest number of sequences (up to four) and rotifers and chelicerids are again among the species with the largest number of genes.

## The vertebrate *CNGA* genes

The phylogenetic tree of the *CNGA* amino acid sequences shows three well supported bony vertebrate clades; one for *CNGA1*, one for *CNGA2* and one for *CNGA4* (Fig 4). The *CNGA3* sequences do not form a single well-supported clade, but rather several where three separate clades have high support: one of actinopterygian fishes, one of amniotes, and one of cartilaginous fish (Fig 4). This gene is syntenic with *CNGA4* in the spotted gar, chicken, and small-spotted catshark genomes (5 Mbp, 62 Mbp and 22.7 Mbp apart, respectively) supporting its identity as *CNGA3* and suggesting that a local duplication that took place before 1R and 2R generated the ancestral gene pair. The split between the *CNGA1-3* sequences and *CNGA4* is well supported indicating that *CNGA1-3* resulted from duplications after the *CNGA4* ancestor had branched off, most likely in 1R and 2R (Fig 4). We identified two putative orthologous sequences to gnathostome *CNGA4* among lamprey proteins in the NCBI non-redundant protein database (Fig 4). We queried agnathan genomes in the NCBI database using the human *CNGA4* amino acid sequence and found that *CNGA4* are not located on the same chromosome as any putative *CNGA1-3* in any of the lamprey or hagfish genomes (S2 Table). The far eastern brook lamprey (*Lethenteron reissneri*) genome, however, has two *CNGA* genes located

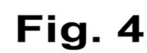

**Fig 1. Phylogenetic analysis of all identified metazoan CNGA and CNGA-like sequences.** Colors represent well supported metazoan subfamilies of the CNGA subtype and its most closely related subtypes as identified in this analysis. The colored text represents the proposed name of each novel subtype. The CLZ domain, important for trimerization of the CNGA subunits, was identified only among the classical CNGA genes. The tree was constructed using IQ-Tree version 1.6.1 with 10,000 ultra-fast bootstrap replicates. The tree shown is the consensus tree, nodes are considered strong when they had a support  $\geq 90\%$ . Well supported nodes have been labelled with a filled red circle. The phylogenetic trees were rooted with the human HCN1-4 sequences and human CNGB sequences was included as reference respectively.

<https://doi.org/10.1371/journal.pone.0279548.g001>

on the same chromosome, but they are probably the result of a lineage specific duplication or an assembly error due to the identical amino acid sequence (S2 Table). Analysis of actinopterygian CNG genes is described in a separate section.

### The vertebrate CNGB genes

The phylogenetic tree of the amino acid sequences of the CNGB subfamily forms a well-supported clade for the vertebrate CNGB1 sequences (Fig 5). The same goes for the CNGB3 clade which has high support (Fig 5). Two lamprey sequences appear to be CNGB1 while three other sequences branch off basally to all gnathostome GNB sequences (Fig 5). Analysis of actinopterygian CNG genes is described in a separate section.

### Evolution of CNG genes in actinopterygian fish

To investigate the CNG gene repertoire further in a group of vertebrates with a rich and dynamic opsin gene repertoire, we complemented our analysis by performing reciprocal BLASTP searches against the NCBI RefSeq protein database restricted to actinopterygian fish. The identified sequences were aligned and subjected to phylogenetic analysis. From these data it appears as if most duplicates are the result of WGDs. We observed that non-teleost actinopterygian fish have four CNGA genes, except for sturgeons and paddlefishes that have seven genes (Fig 6A). In general, teleost fish have seven CNGA genes, with exceptions e.g. cyprinids and salmonids have experienced extra lineage specific WGDs (Fig 6A). Teleost CNGA1, CNGA2 and CNGA3 have duplicates located on separate chromosomes, which is indicative of duplication in 3R. Further investigation of the chromosomal locations of the genes in actinopterygian fishes, with chromosome level assemblies, indicated four local/tandem duplications in CNGA3 in the green spotted pufferfish (Fig 4), in CNGA1 of the jewelled blenny (*Salarias fasciatus*), CNGA2 of the mummichog (*Fundulus heteroclitus*), CNGA3 in the sterlet (*Acipenser ruthenus*) and CNGA4 in the goldfish (*Carassius auratus*) (S2 Table). We observed that most species have between three and four CNGB genes with some exceptions. Like CNGA genes, some cyprinids and salmonids have extra duplicates (Fig 6A). Notably, reedfish and gray bichir have a lineage specific local duplication of CNGB1 (Figs 5 and 6A). Investigation of the chromosomal locations of the CNGB genes in teleost fish revealed that most putative local duplications are for CNGB3, due to the proximity of the genes (~22 kbp in zebrafish, S1 and S2 Tables). Similarly, we found that the Asian arowana genome (*Sclerophages formosus*), a teleost species belonging to a group (bonytongues) that diverged early from most other teleost species, has two copies of CNGB3 located close to one another on the same chromosome (chromosome 19, ~16 kbp apart in the fScFor1.1 assembly, Ensembl 102) (S18B Fig in S1 File, S2 Table). Indeed, these two CNGB3 duplicates seem to be present in many teleosts genomes available in Ensembl 102. The presence of only one CNGB3 in spotted gar and reedfish lends further support for a local duplication in the teleost ancestor (Figs 5, 6A and 6C). Taken together, this indicates that the duplication occurred early after 3R. Chromosome level assemblies also reveal that only three of these teleost fish species have putative local duplicates for CNGB1, namely



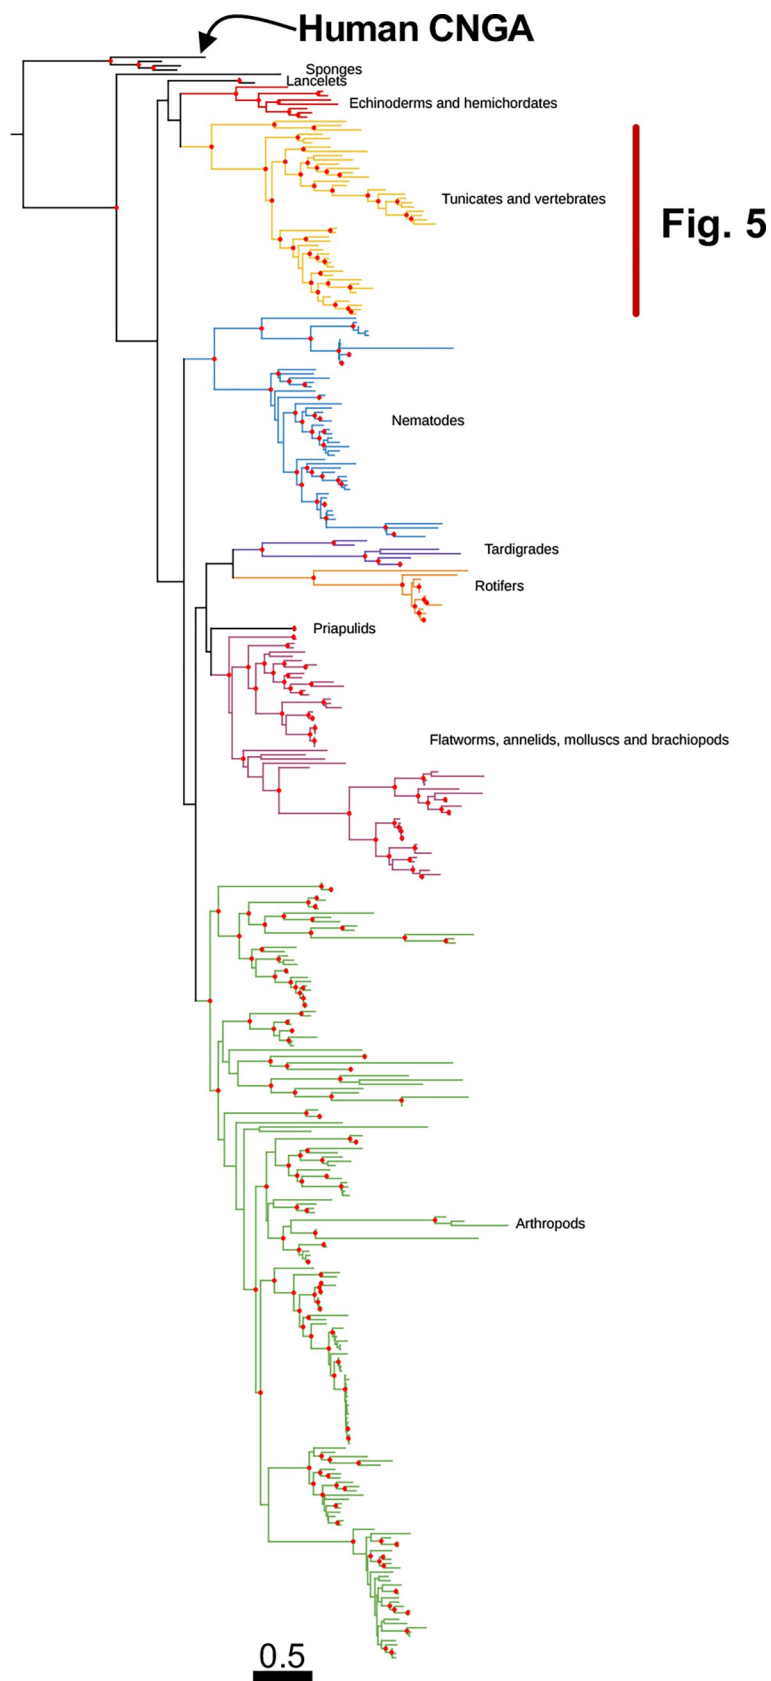

**Fig 2. Phylogenetic analysis of all identified metazoan CNGB type sequences.** Colors represent strongly supported clades labelled with metazoan groups that are included in each clade. The tree was constructed using IQ-Tree version 1.6.1 with 10,000 aLRT and ultra-fast bootstrap replicates. Nodes are considered strong when they have an aLRT supports  $\geq 80\%$  and an ultra-fast bootstrap support  $\geq 95\%$ . Well supported nodes have been labelled with a filled red circle. The tree was rooted with the human HCN1-4 sequences and human CNGA sequences were included as reference.

<https://doi.org/10.1371/journal.pone.0279548.g002>

the Siamese fighting fish (*Betta splendens*), the lake whitefish (*Coregonus clupeaformis*) and the Sumatra barb (*Puntigrus tetrazona*) (Fig 6A, S2 Table). The Japanese pufferfish genome contains eight CNGB genes, most being located on the same chromosome (chromosome 10). This is most likely due to a lineage specific local duplication or is an artefact of assembly error (Fig 6A, S2 Table).

### Comparative synteny analysis of the chromosomal regions harboring the CNGA genes

In the selection of neighboring gene families, we identified nine gene families with members on the three CNGA-carrying chromosomes in spotted gar. Out of these nine, two gene families encode the GABA<sub>A</sub>  $\alpha$  and  $\beta$  subunits. These gene families have been analyzed independently by our group and will be presented in a separate manuscript describing the complex evolution of all GABA<sub>A</sub> receptor subtypes in vertebrates (Haines *et al.*, in preparation). The phylogenetic trees of the remaining seven neighboring gene families are shown in S1-S7 Figs in S1 File. Of these seven families, *KCTD*, *BMX*, *RAB33*, *ELF* and *NIPA* have a topology that is consistent with an expansion in the timeframe of 2R. *EDNR* and *PCDH* did not have non-chordate sequences annotated that could be used as outgroup. This means that although the topology is compatible with an expansion in 2R it is difficult to date their duplications relative to the 2R events.

After mapping neighboring gene family members to chromosomes in six vertebrate genomes with chromosome level assemblies, we observed several instances of gene translocations in human compared to the other gnathostomes included in the analysis (Fig 6B). In particular, one of the four chromosomes (with the genes marked as green boxes) in this paralogon that has undergone rearrangements in human, dispersing the genes to four different chromosomes (2, 11, 13 and 15), whereas they are neatly syntenic in chicken, reedfish, spotted gar and small-spotted catshark. Somewhat confusingly, one *BMX* family member has been translocated to human chromosome X that already has a member of this family. Although the CNGA3 genes in the phylogenetic analysis of the CNGA family did not form a single clade, the comparison of synteny provides evidence in favor of these sequences being orthologs (Figs 4 and 6B). When comparing the conservation of synteny between the spotted gar and reedfish (representing an even earlier diverging actinopterygian lineage), we observe a high level of conservation (Fig 6B). Comparison of zebrafish with spotted gar and reedfish shows several duplications consistent with 3R, but also many translocations compared to the two non-teleost genomes, most likely following 3R, as has been observed in different lineages after WGD events by us and others [11,37–39].

The small-spotted catshark displays strong conservation of synteny to the spotted gar and reedfish, indicating that this is the ancestral gnathostome organization (Fig 6B).

### Comparative synteny analysis of the chromosomal regions harboring the CNGB genes

We identified 11 neighboring gene families for the CNGB genes that have members on both chromosomes with CNGB genes in spotted gar. Out of these families one (*SPG7/AFG3*



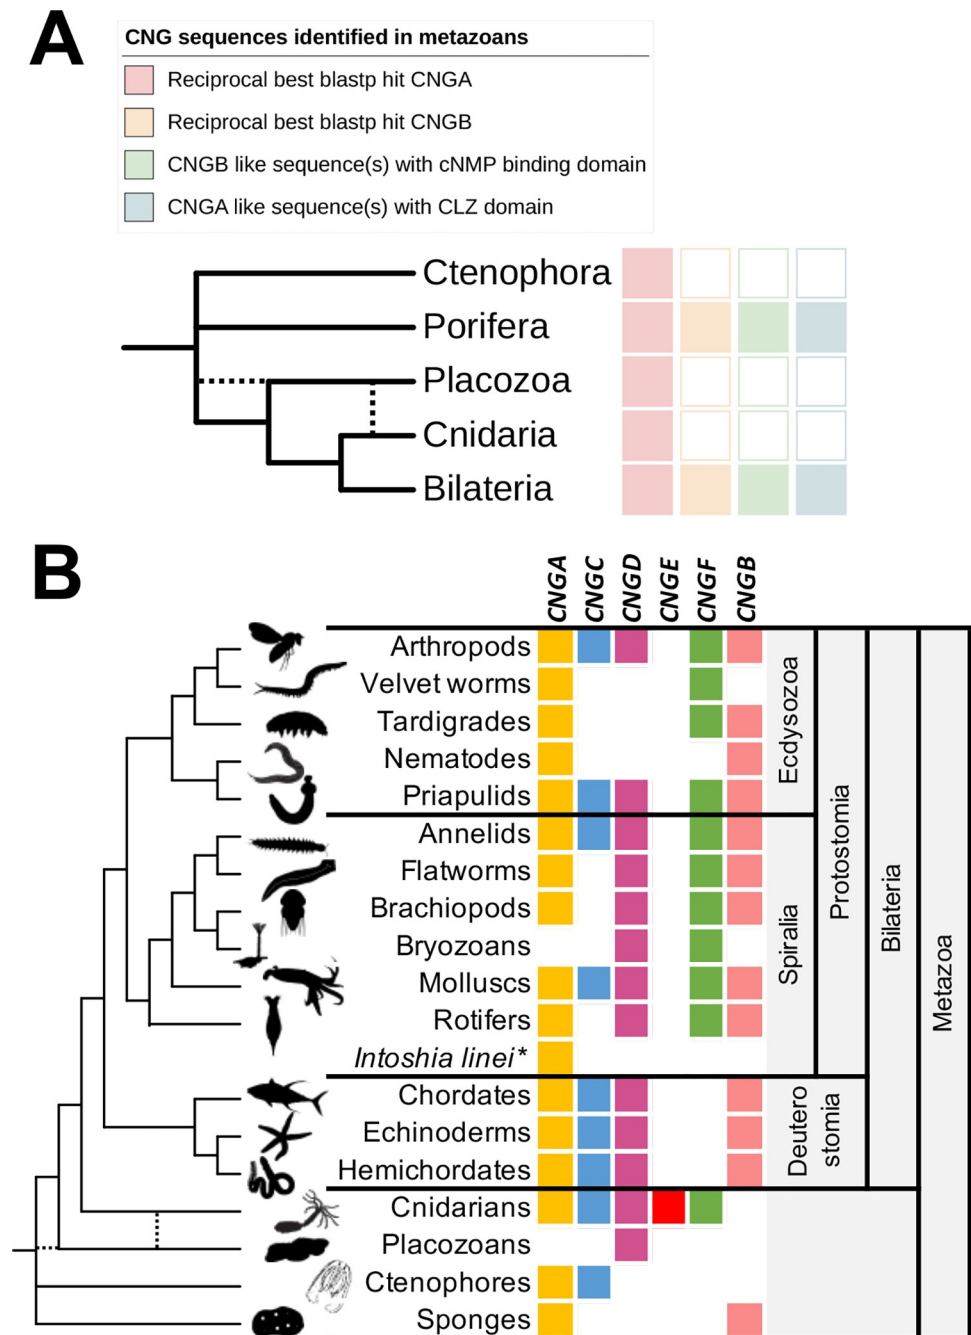

**Fig 3. CNGA and CNGB type genes in metazoans.** A) Summary of BLASTP searches for CNG genes in metazoans after PfamA screening for CNG channel domains. The results show that only animal groups that have CNGA genes with a CLZ domain also have genes of the CNGB type. Dotted lines represent alternative branching for the placozoa lineage. B) Presence or absence of genes of the CNGA and the CNGA-like subtypes in the different animal groups included in the analysis. The results show that there have been several lineage specific losses within protostomes and deuterostomes. The Bilaterian ancestor most likely had CNGA, CNGC, CNGD and CNGF genes. The ancestor of deuterostomes lost the CNGF gene. The only lineage that has genes of all CNGA-like subtypes is Cnidarians. *Intoshia linei* is labelled with an asterisk due to its uncertain position. Silhouettes were retrieved from [phylopic.org](http://phylopic.org) and are all dedicated to the public domain.

<https://doi.org/10.1371/journal.pone.0279548.g003>

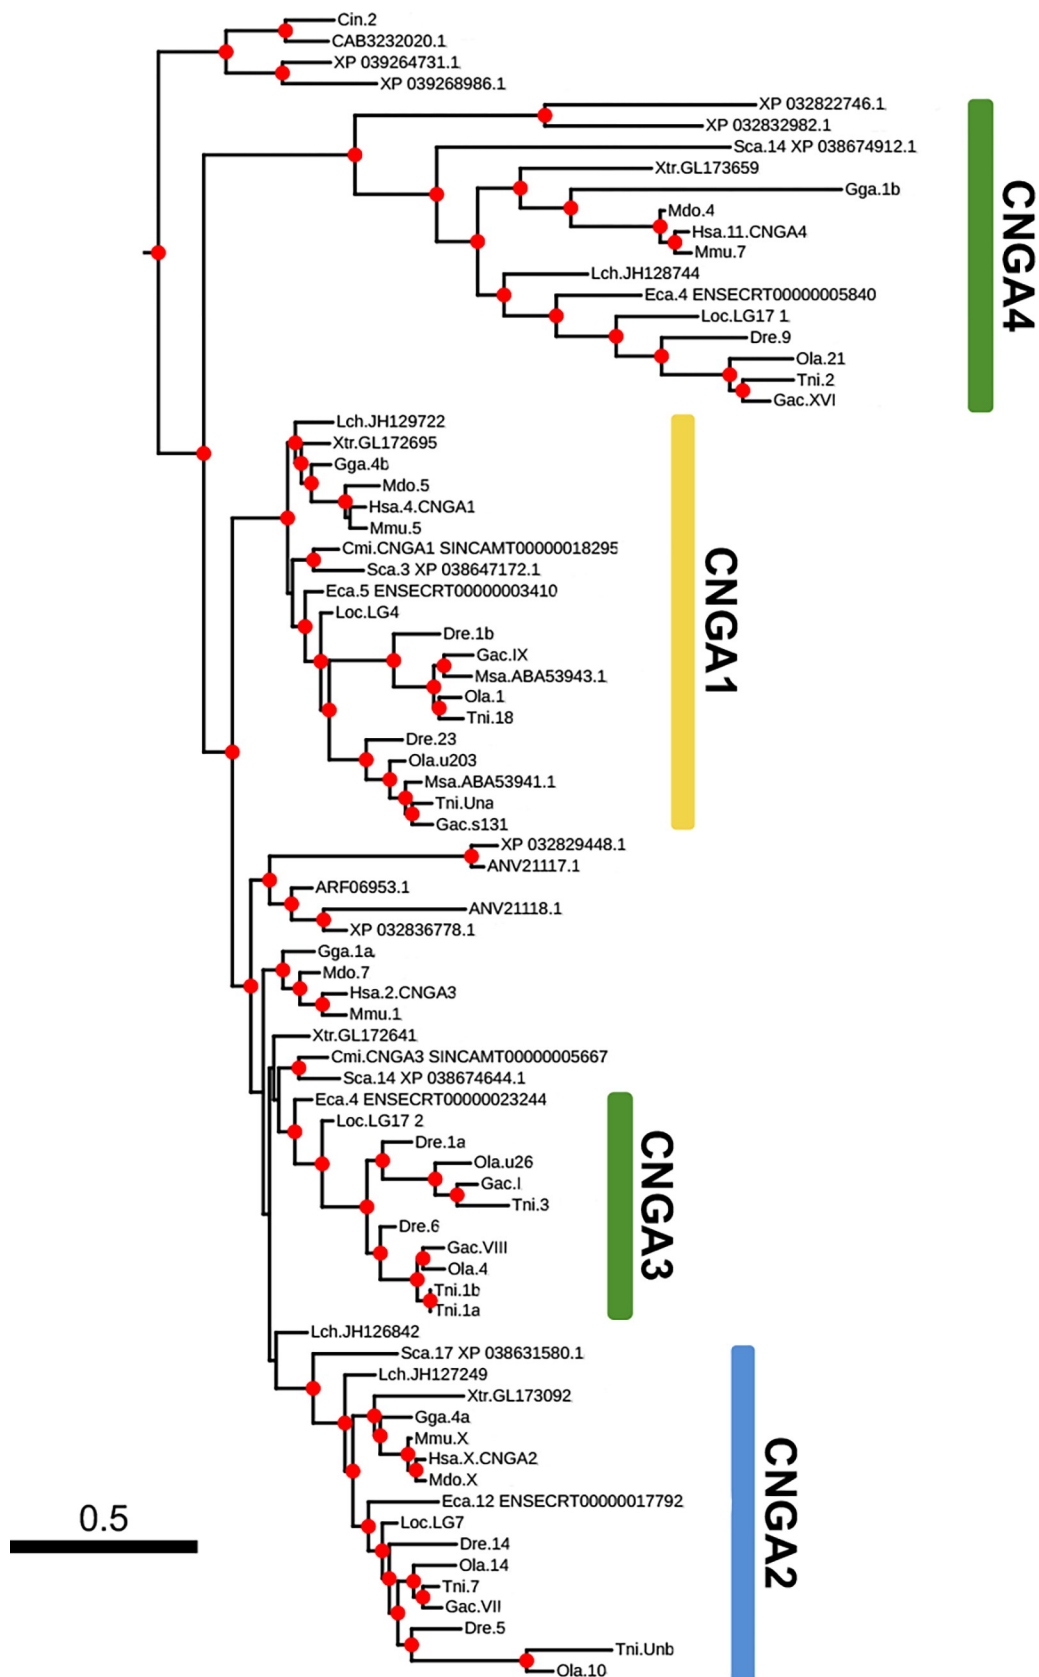

**Fig 4. Enlarged portion of Fig 1 showing the Olfactores clade of the classical CNGA sequences.** Vertebrate clades are colored based on the chromosome of the closest spotted gar ortholog and corresponds to colors used in Fig 8B; CNGA1 – yellow, CNGA2 blue, CNGA4 and CNGA3 –green.

<https://doi.org/10.1371/journal.pone.0279548.g004>

ENSFM00730001521276) was excluded due to expansion in a time-frame other than 2R. The other 10 families show a duplication history compatible with an expansion in 2R (see S8-S17 Figs in S1 File).

Chromosome blocks with clear conservation between the non-teleost actinopterygian fishes spotted gar and reedfish were identified analogously with the CNGA paralogon (Fig 6C). Also,

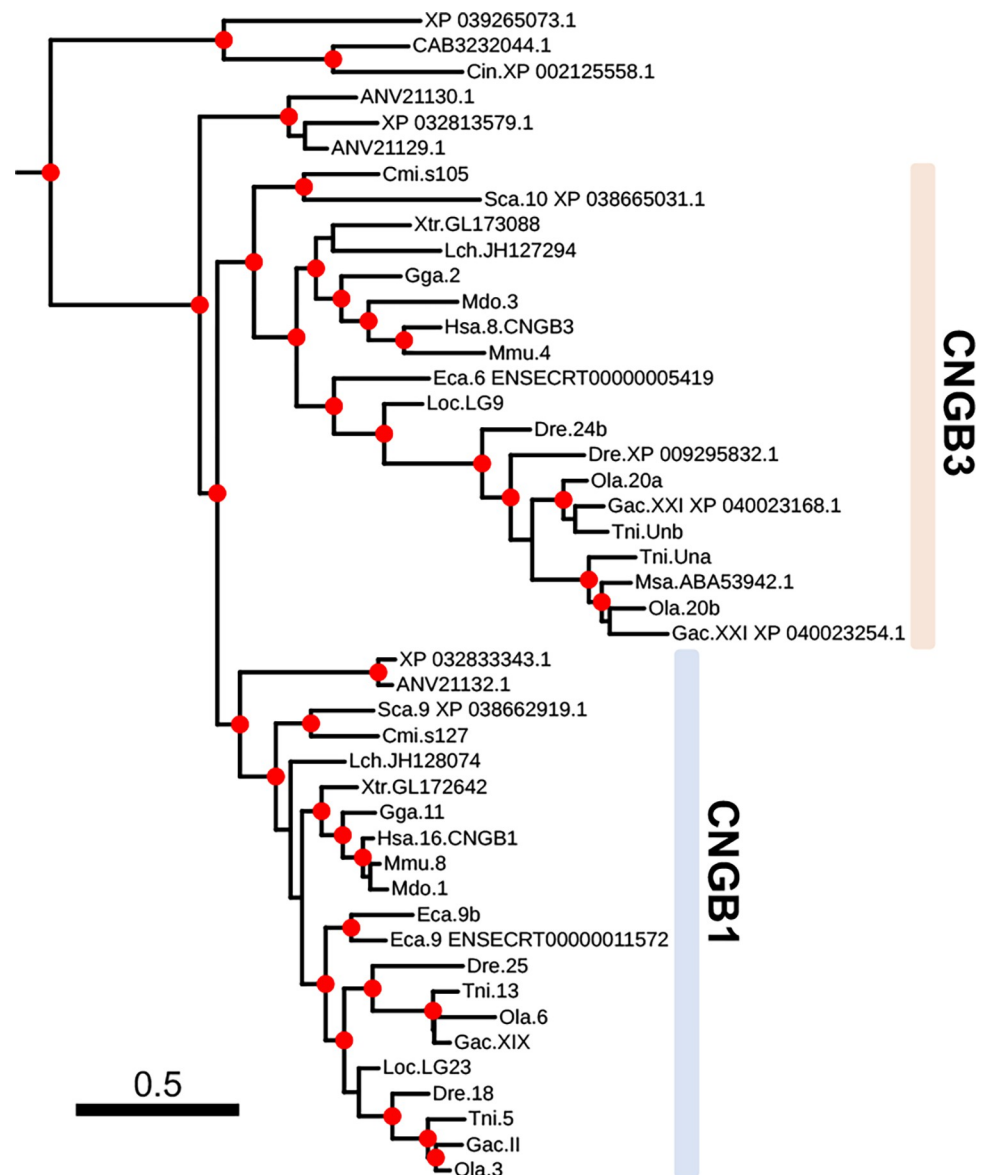

**Fig 5. Enlarged portion of Fig 2 showing the Olfactores clade of CNGB sequences.** The gnathostome sequences clearly have been subdivided into two clades, CNGB1 and CNGB3. Vertebrate clades are colored based on the chromosome of the closest spotted gar ortholog and corresponds to colors used Fig 8C; CNGB1 –light blue, CNGB3 –light pink.

<https://doi.org/10.1371/journal.pone.0279548.g005>

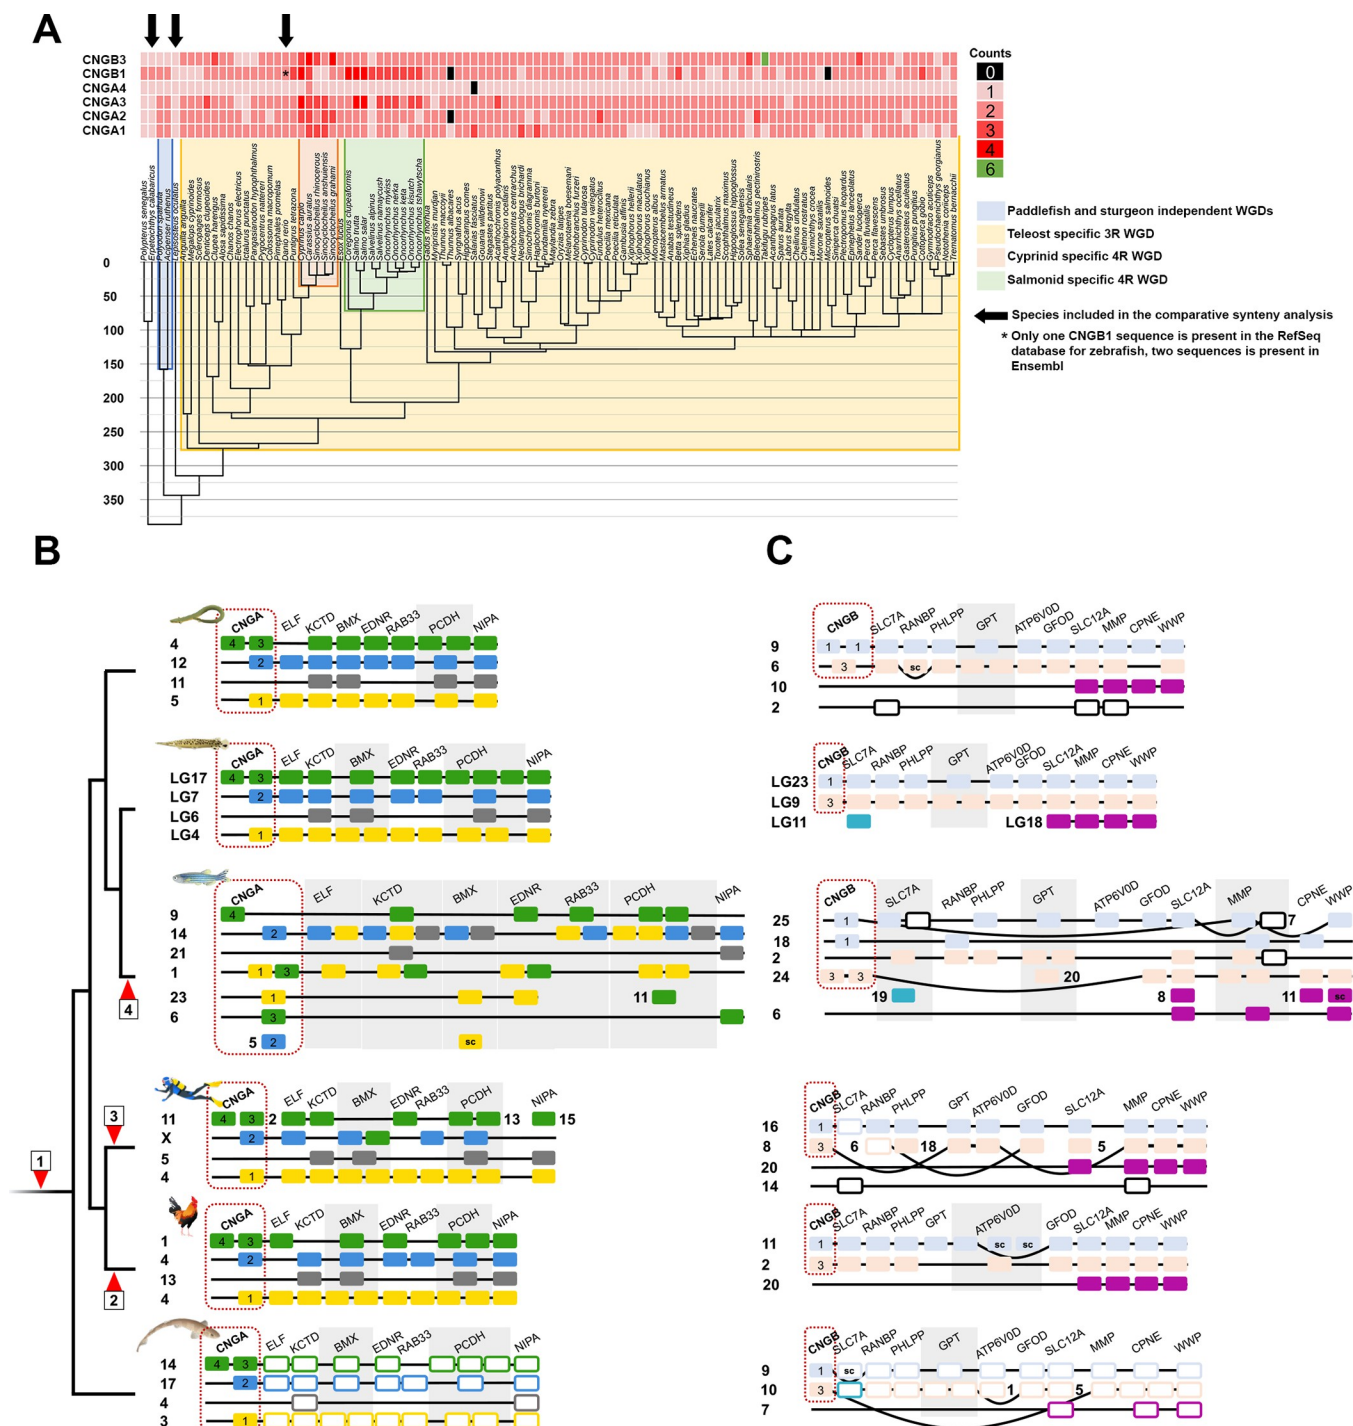

**Fig 6. CNG sequence counts mapped to a time-calibrated phylogeny of ray-finned fish and comparative synteny analyses of CNGA and CNGB gene regions in select vertebrates.** A) A time-calibrated phylogeny retrieved from [timetree.org](https://timetree.org) of actinopterygian fishes and the CNGA and CNGB gene counts as a heatmap. Lineages marked with a colored background have experienced extra whole genome duplications. B) Chromosomal neighborhoods of CNGA genes in the spotted gar genome used in the phylogenetic analyses, and their orthologs, and their neighboring gene family members, in reelfish, zebrafish, human, chicken and small-spotted catshark. C) Chromosomal neighborhoods of CNGB genes in the spotted gar genome used in the phylogenetic analyses and their orthologs, as well as their neighboring gene family members, in reelfish, zebrafish, human, chicken and small-spotted catshark. Order of genes has been reshuffled to highlight similarities between the linkage groups within the paralogon and between species. The phylogenetic trees of the neighboring gene families are shown in S1-S17 Figs in [S1 File](#). Red arrow heads represent: 1) 2R WGDs; 2) Chromosomal fusion in the chicken lineage; 3) rearrangements in the mammalian lineage; and 4) 3R WGD in teleost fish. Spotted gar chromosomes are colored as they are in [Fig 1B and 1D](#), while the other animals' orthologs are colored the same as their spotted gar ortholog—see [Figs 6 and 7](#). Boxes for neighboring gene families in the small-spotted catshark have been left white with colored edges since they are not included in phylogenetic analyses. Numbers in gene boxes indicate which CNGA or CNGB gene the box represent.

<https://doi.org/10.1371/journal.pone.0279548.g006>

like for the *CNGA* paralogon, we observed evidence for 3R followed by major rearrangements in zebrafish when compared to the other two actinopterygian fish species (Fig 6C). Comparison of synteny between spotted gar, human and chicken indicated rearrangements in mammals, although not as extensive as for *CNGA* described above (Fig 6C). It is nevertheless clear that the *CNGB* genes are located within blocks of conserved synteny that provide strong evidence for orthology of the *CNGB3* gene in these species.

We also investigated the location of the best ortholog matches for each neighboring gene family member in the small-spotted catshark genome. Thereby we observed extensive conservation of synteny with spotted gar and reedfish. However, in contrast to the *CNGA* paralogon, there seem to have been some rearrangements in the small-spotted catshark genome in the *CNGB* paralogon (Fig 6C).

Gene loss has been more extensive in the *CNGB* paralogon than in the *CNGA* paralogon, and only reedfish, zebrafish and human (and other mammals) have gene families with a fourth paralogon member (Fig 6C): only a single gene family is a quartet in human and zebrafish (*MMP*) and two families are quartets in reedfish (*MMP* and *SLC12A*). Also, *SLC7A* supports a fourth chromosome member of the paralogon, but this family has lost two 2R paralogs.

## Expression of CNG genes outside of vertebrates

To investigate the possible composition of CNG channels in non-bilaterian metazoans we queried scRNA-seq datasets from a ctenophore, a sponge, a placozoan and a cnidarian [40,41]. When plotting the expression of *CNGA* and *CNGC* identified in the ctenophore *Mnemiopsis leydi*, we observed that the two genes have different expression patterns in mostly non-overlapping metacells (groups of highly similar single cells) (Fig 7A). *CNGA* has a much broader expression in many metacells that have among others been identified as sensory, neuronal, or part of the subepithelial nerve net [42]. *CNGC* on the other hand has its highest expression in the metacells identified as digestive in the original publication. Similarly, in the adult sponge, *Amphimedon queenslandica*, *CNGA* has broad expression in many metacells of different types while *CNGB* has strong expression in bactericidal, aspcinzin and pinacocyte cells (Fig 7B). In the larval sponge, both genes are co-expressed in several metacell subtypes (Fig 7B'). The single gene identified in the placozoan *Trichoplax adherens*, *CNGD*, is expressed in epithelial, digestive and lipophile metacell types (Fig 7C). Finally, three of the five CNG genes identified in the cnidarian *Nematostella vectensis*, the non-bilaterian with the most CNG genes, show overlapping expression in similar cell types in the adult animal with the highest expression of *CNGD*, *CNGE*, and *CNGF* in neuronal, secretory gland, gastrodermis and digestive filament metacells (Fig 7D). *CNGA*, however, seem to be mostly expressed in digestive filaments and *CNGC* has very low expression overall (Fig 7D). In the larval *Nematostella vectensis* only three genes are expressed, *CNGD*, *CNGE* and *CNGF*. Out of these genes *CNGE* has the highest expression, which is strongest in a neuronal metacell (Fig 7D').

By plotting the expression of the identified *Ciona intestinalis* CNG genes in a scRNA-seq dataset of neural cell types during development [39] we observed a similar decoupling of expression between *CNGA* and *CNGB* genes as in the adult sponge, but where *CNGD* appeared to take the role of *CNGB* being co-expressed with *CNGA* in some cells (Fig 7E). There are two cell types that express *CNGB* and *CNGA* at high levels, coronet cells and Rx + aSV cells, of which the latter are photoreceptor cell progenitors. They are also co-expressed in photoreceptor cells (Opsin1+ STUM+ aSV cells and Opsin1+ PTPRB+ aSV cells) but at low levels. Finally, like in the sponge, some *Ciona intestinalis* cell types only express *CNGB* (Fig 7E).



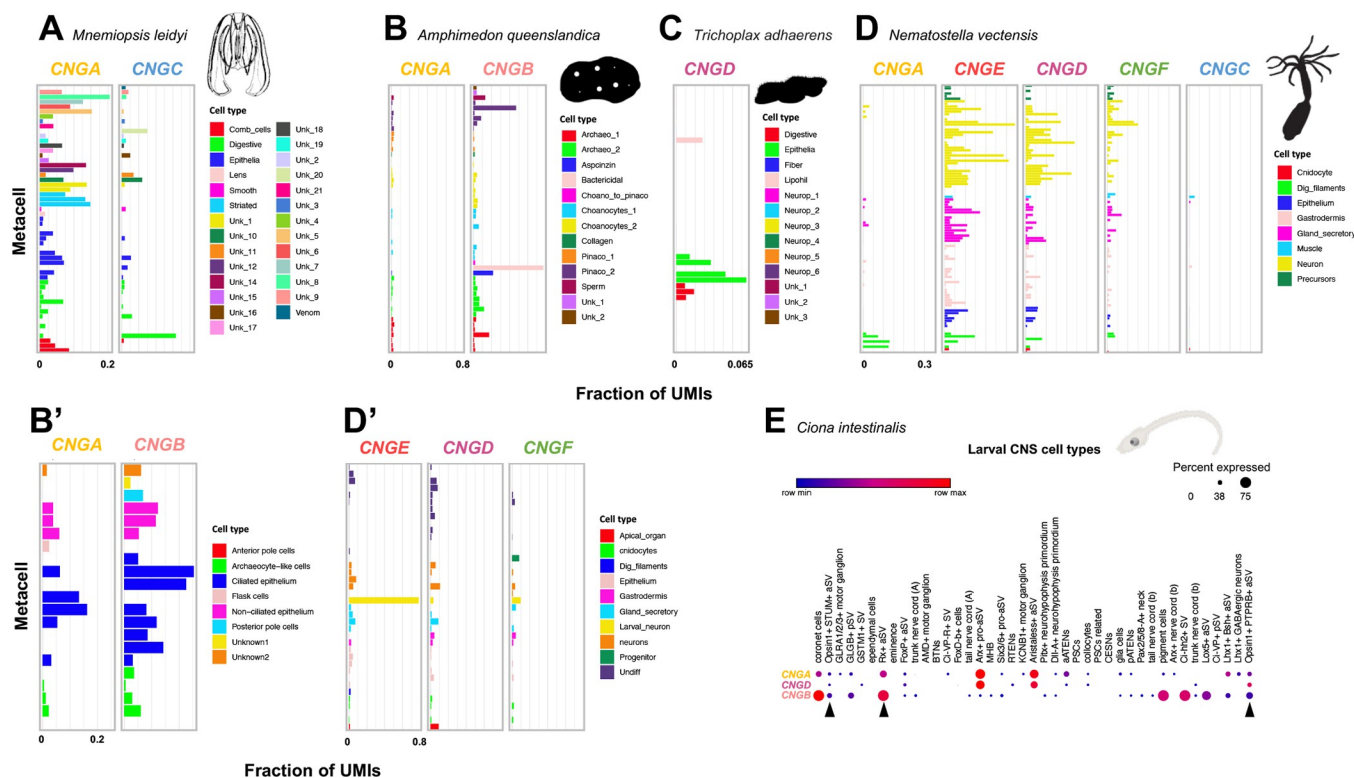

**Fig 7. Expression of CNG genes in non-bilateria metazoans and in the tunicate *Ciona intestinalis*.** A) Expression of *CNGA* and *CNGC* in ctenophore metacells shows differential expression across cell types. B) Expression of *CNGA* and *CNGB* in sponge adult metacells show, like in the ctenophore, differential expression of both genes. B') Co-expression of both genes in the larval sponge. C) Expression of the single *CNGD* gene in the placozoan metacells. D) Expression of the five CNG genes in the adult cnidarian *Nematostella vectensis* show overlap in expression in the same metacells for *CNGE*, *CNGD* and *CNGF*, while *CNGA* and *CNGC* have lower expression. *CNGA* has its highest expression in digestive filament metacells. D') In the larval *Nematostella vectensis* only *CNGE*, *CNGD* and *CNGF* are expressed and *CNGE* has the highest expression in larval neurons. E) Expression of the identified CNG genes in the *Ciona intestinalis* larval central nervous system show both overlapping expression of *CNGA* and *CNGB*, and *CNGA* and *CNGD* as well as expression of only *CNGB* in some cells. Black arrows represent photoreceptor cells in the anterior sensory vesicle or their precursors. Silhouettes were retrieved from [phylopic.org](https://phylopic.org) and are all dedicated to the public domain. Illustration of *Ciona intestinalis* larva was kindly provided by Dr. Daniel Ocampo Daza.

<https://doi.org/10.1371/journal.pone.0279548.g007>

## Discussion

This analysis of the evolution of the CNG genes was sparked by our previous finding that the separate CNG gene subtypes for rods and cones appeared to have arisen in the early vertebrate tetraploidizations [2,3]. However, that conclusion was based largely on investigation of the human genes, and we had noticed that the chromosomal regions containing the CNG genes seemed to have been subjected to rearrangements [3], precluding assignment to specific paralogons. Additionally, the origin of the different CNG genes had not been described in detail outside of vertebrates. Therefore, we first set out to date the origin of the genes encoding *CNGA* and the *CNGB* subunits in metazoans, then we employed comparative synteny analyses in a broad range of vertebrates with the spotted gar genome [10] as a reference to resolve the vertebrate genome rearrangements. Lastly, we investigated the gene family expansions in teleost fish, a group of vertebrates that have diverse retinal specializations.

Here we have discovered previously uncharacterized CNG genes in metazoans and propose the names; *CNGC*, *CNGD*, *CNGE* and *CNGF*. These findings suggest that the metazoan common ancestor had a large CNG gene repertoire (Fig 8). Our analyses did not explore whether these are present outside of metazoans, so it remains possible that they are present in non-metazoan eukaryotes as well. Our analyses also show that the ancestor of Olfactores lost *CNGC*



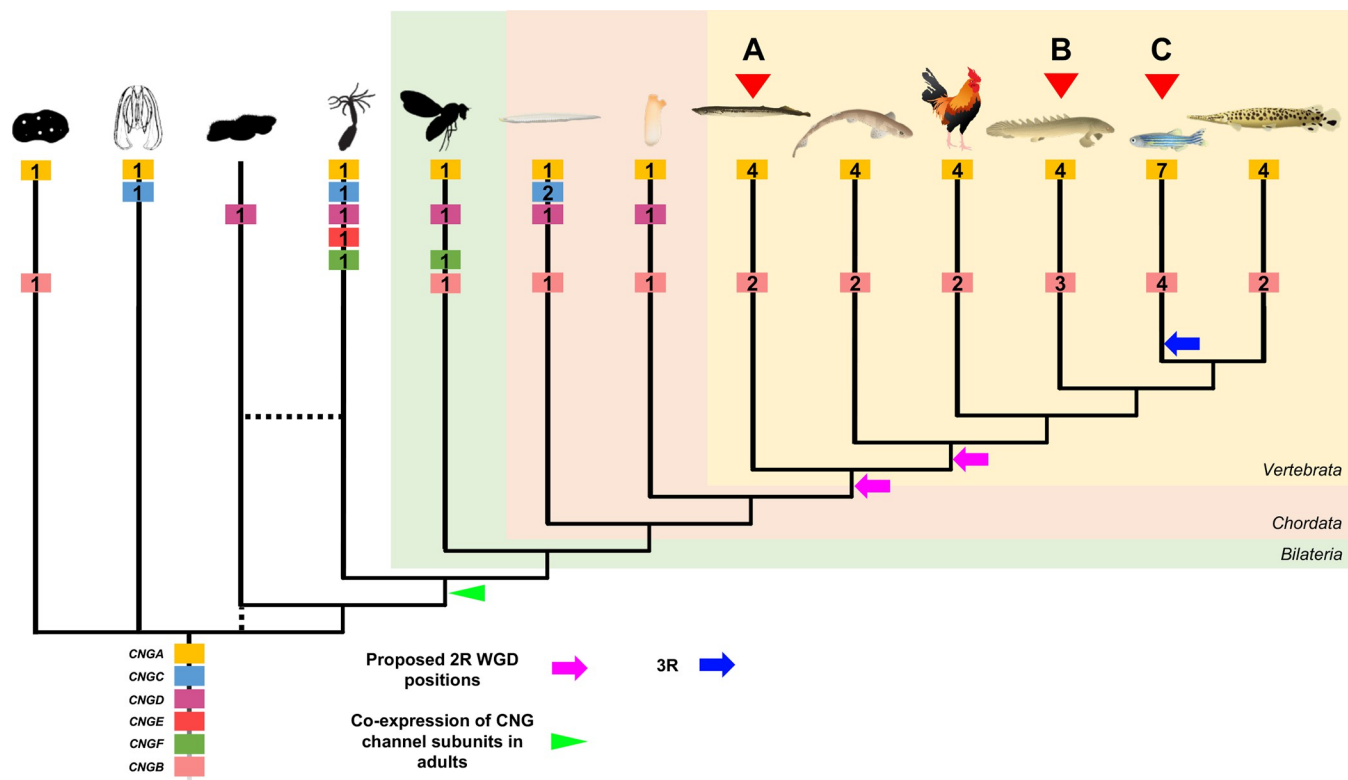

**Fig 8. Evolutionary events leading to the repertoire seen in modern metazoan groups.** Subunit gene repertoire was reduced in the vertebrate ancestor and expanded in the 2R WGDs in the vertebrate lineage either before or after the split between cyclostomes and gnathostomes (purple arrows). Expression of multiple CNG subunits in adult cell types appeared in the ancestor of Cnidaria and Bilateria (green arrowhead). A) Lamprays have an extra duplicate of *CNGA4*. B) The Grey bichir has a local duplicate of *CNGB1*. C) The 3R WGD and a local duplicate of *CNGB3* expanded the number of genes in teleosts further. Numbers in gene boxes represent the number of genes of this subtype in this lineage. The tree is a cladogram and branch lengths does not represent evolutionary distance. Silhouettes were retrieved from [phylopic.org](http://phylopic.org) and are all dedicated to the public domain. Illustrations of chordates was kindly provided by Dr. Daniel Ocampo Daza.

<https://doi.org/10.1371/journal.pone.0279548.g008>

and *CNGF*, while *CNGE* was lost before the emergence of Bilateria. Later the vertebrate ancestor lost *CNGD*, which has been retained in tunicates, before 1R and 2R (Fig 8). The vertebrate *CNGA* subfamily is divided into two clades, *CNGA4* and *CNGA1-3* (our results presented here and previous studies [2,3,36]). Our analyses of a broad repertoire of non-vertebrate metazoans show that this duplication took place just before 2R. This conclusion differs from the scenario outlined by Lamb and colleagues, who proposed an even earlier timeframe for the local duplication; before the protostome-deuterostome split (see Fig 5 in [14]; Fig 13 in [13]). We think that the broader selection of species used in this study renders a more parsimonious conclusion. These *CNGA* genes then duplicated in 1R and 2R (thus quadrupled) whereby the *CNGA1/2/3* ancestor resulted in the present three copies (*CNGA1-3*) after loss of the fourth member. The *CNGA4* gene, in contrast, has retained none of the 2R duplicates. Thus, the repertoire in the common ancestor of gnathostomes was four *CNGA* genes (Fig 8).

Since gene families are affected by differential rates of evolution and selection pressures on their constituent genes, we also investigated in detail the phylogenies of neighboring gene families of *CNGA1-3* and *CNGA4*. We identified a paralogon conserved across several diverse gnathostome species (Fig 6B and S1-S7 Figs in S1 File). We found that the genes orthologous to those located on spotted gar chromosome LG17 had been split across four chromosomes in human (green genes in Fig 6B). We also observed that the orthologs of the genes located on

spotted gar chromosomes LG7 and LG4 had been translocated to chromosome 4 in chicken (blue and yellow genes respectively in Fig 6B). Comparisons of our data with reconstructions of the ancestral chordate karyotype, show that these four paralogous regions belong to paralogon C, F and D in the analysis of Nakatani *et al.* [43] and ancestral group 15 described in the analyses by Sacerdot *et al.* [44] and Lamb (2021) [45]. The most recent publication by Nakatani *et al.*, [46], suggests that the *CNGA* regions originated from proto-vertebrate chromosomes 4, 6, 7, 8, 9 and 11 [46]. Thus, these studies show extensive rearrangements in this region after 2R, further clarifying why it has been difficult to disentangle the evolution of these genes before the present study.

Upon searching for *CNGB* genes, we only found orthologs of the vertebrate genes in lineages that also have *CNGA* genes with a CLZ domain (Fig 3A). Previous studies have shown that *CNGA* subunits first form a heterotrimer, facilitated by the CLZ domain, that later bind to a *CNGB* subunit to form a functional heterotetrametric channel [20]. If the CLZ domain is removed from *CNGA1*, the channels combine in an uncontrolled manner with an excess of *CNGB1* subunits resulting in a dominant negative effect by forming channels that are not as efficiently expressed in the cell membrane [20]. We therefore postulate that there is a constraint that makes it unfavorable to express *CNGB* in the same cells as a *CNGA* subunit without the CLZ domain and that any of the other subtypes of *CNGA*-type CNG genes take the role of *CNGB* in these cases.

In vertebrates the *CNGB* subfamily consists of two genes [2,3,14] as confirmed by the analyses described here (Fig 5). The duplication resulted from 1R or 2R as shown by our analyses of conserved synteny and paralogon (Fig 6C). We previously reported that these genes appeared to share evolutionary history with the paralogon of the four opioid receptor genes, which were shown to have duplicated in 2R [2,3,47,48]. This is the paralogon that was named B in the report by Nakatani *et al.* [43] and much later named ancestral linkage group 10 in the supplementary data tables of Sacerdot *et al.* [44] and Lamb (2021) [45]. According to the most recent publication by Nakatani *et al.*, [46], the *CNGB* regions were suggested to have originated from proto-vertebrate chromosome 2 and 3 [46]. Although the *CNGB* subfamily only has two members, we found neighboring gene families on three chromosomes and a putative fragmented fourth member (Fig 6C). Interestingly, the regions corresponding to spotted gar LG9 in small-spotted catshark and human have been independently rearranged providing further clues as to why this was difficult to resolve previously (Fig 6C).

As the visual system of actinopterygians had often experienced extensive duplications of visual opsins [49], we decided to investigate the CNG gene content in many of these species. This revealed a clear pattern where most retained gene duplicates in this lineage are from WGD events: either 1R or 2R, the different sturgeon-specific WGDs, teleost-specific WGD (3R), salmonid-specific 4R WGD and the carp-specific 4R WGD. We found that *CNGA1*, *CNGA2*, *CNGA3* and *CNGB1* all most likely acquired duplicates from the teleost-specific 3R WGD (Figs 4, 5 and 6A and S18A Fig in S1 File). Duplicates of *CNGB3* in teleost fish, on the other hand, are due to a local duplication in the teleost ancestor. In the investigated species, with chromosome level assemblies, nine had putative lineage specific local duplicates that were not the *CNGB3* duplication (Fig 6A and S2 Table). These observations are in strong contrast to observations of gene duplications of the visual opsins, where most post-2R duplications are due to tandem duplications with only a few cases of retained 3R duplicates [49]. A possible explanation is that four subunits are required for each CNG channel and if one gene is duplicated more than the others, the proportions become skewed, while more copies of the visual opsins, allow for a wider spectral range. Interestingly, the only CNG gene that has not retained any extra duplicates (except in goldfish (*Carassius auratus*)) is *CNGA4* (Fig 6A). This may be because it encodes a modulatory subunit, which together with two *CNGA2* and one *CNGB1*

subunit forms the functional channel in olfactory neurons [21]. However, this cannot alone explain why only this gene lacks additional duplicates, since the CNGB subunits also play a modulatory role.

Our investigations into non-bilaterian CNG gene expression reveal that in ctenophores and sponges these genes seem have the highest expression in non-overlapping cell types (Fig 7A and 7B), which indicates that the subunit proteins either form homotetrameric channels or form channels with other distantly related ion channel proteins. This is especially peculiar in the case of CNGB in sponges since vertebrate CNGB1 has been shown to be unable to form functional homotetrameric channels [50,51], in contrast to the different CNGA subunits. The CNG genes of the cnidarian, *Nematostella vectensis*, show in several cases overlapping expression (Fig 7D), opening the possibility to form heterotetrameric channels and thus opening the possibility for more functional variation among these channels.

Studies in the cnidarian *Hydra vulgaris* (*magnipapillata*) have provided evidence for an ancient role in photosensitive neurons [25,52]. A role in phototransduction has also been shown in other non-chordate bilaterians such as the annelid *Platynereis durmelii* and the insect *Drosophila melanogaster* showing that the type of phototransduction cascade of vertebrate cones and rods, i.e., ciliary type, were present before the radiation of metazoans [25,27,28,52]. It is interesting to note that according to our analysis the *Hydra vulgaris* sequence mentioned above is of the CNGD type, while both the *Platynereis durmelii* CNG sequences and the *Drosophila melanogaster* sequence, that have been investigated regarding expression, are of the CNGA type. Additionally, one CNG gene is enriched in planarian eye transcriptomes [53] and most likely of the CNGA type based on similarity by BLASTP (67% identity to this *S. mansoni* sequence included in our tree XP\_018650675.1). These data together indicate an ancient role of CNG channels in phototransduction already before the duplications that resulted in the present metazoan repertoire of six subtypes but also that as far as we know, phototransduction cascades utilizing CNG channels in bilaterians most likely use the CNGA type.

In the tunicate *Ciona intestinalis*, we observed a similar pattern to the non-bilaterian datasets but also similarities with the expression known from vertebrates. The co-expression of CNGA and CNGD in certain neuronal cell types might allow for a non-traditional heterotetrameric channel increasing the functional variability. The CNGD subunit might take the role of the CNGB subunit in these cells because it, like CNGB, lacks the CLZ domain and could together with three CNGA subunits, containing a CLZ domain, form a functional heterotetramer. This would agree with the observations by Stuart *et al.*, (2011) which suggest that no CLZ domain and co-expression of CNGA and CNGB leads a dominant negative effect [20]. Like in the sponge, we could observe certain neuronal cell types that only express CNGB at high levels, suggesting a possibility of this subunit forming homotetrameric channels. However, functional studies of the newly identified CNG gene subfamilies must be performed to fully resolve this. The proposed tunicate and vertebrate ancestral CNG channel compositions have been summarized in Fig 9.

The evolutionary analyses presented here reveal that the striped bass (*Morone saxatilis*) CNGA sequences identified by Paillart *et al.* [54] were misidentified as CNGA1 and CNGA3, most likely due to unexpected expression in rods and cones, respectively, and are instead probable CNGA1 3R duplicates (Fig 4). We and others have previously demonstrated different types of specializations of phototransduction cascade component gene duplicates in zebrafish (see [6,7,55–57] for examples), later confirmed and further complemented by Ogawa and Corbo (2021) who performed single cell RNA-seq analysis of zebrafish photoreceptor and bipolar cells [58]. This indicates that the unorthodox expression in striped bass is not unlikely. The analysis by Ogawa and Corbo shows that *cnga1a*, *cnga1b* and *cngb1a* are expressed in rods (as would be expected from what is known from tetrapods [23]), while *cngb1b*, *cnga3a*, *cnga3b*,

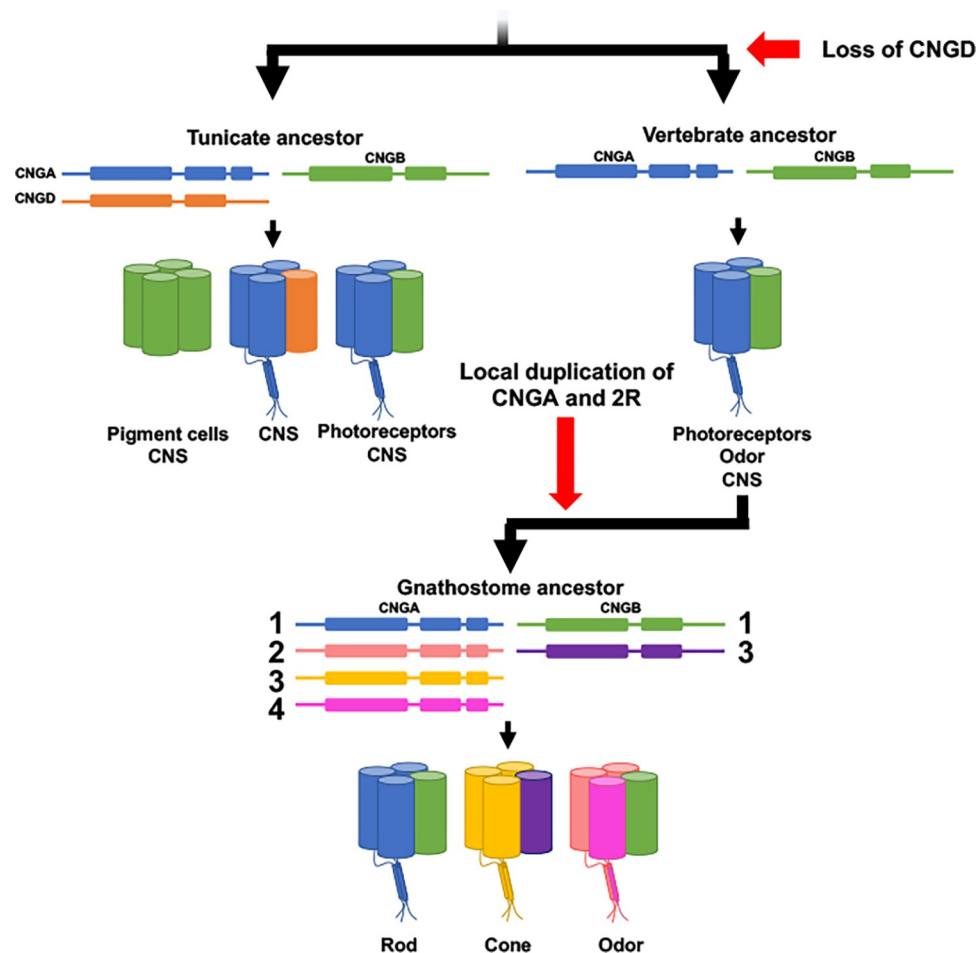

**Fig 9. Evolution and proposed subunit composition in cell types of the tunicate ancestor, vertebrate ancestor and the gnathostome ancestor based on our evolutionary analyses and expression data from *Ciona intestinalis* and human.**

<https://doi.org/10.1371/journal.pone.0279548.g009>

*cngb3.1* and *cngb3.2* are expressed in cones [58]. The expression of *cngb1b* in cones is unexpected and different to the expression of *CNGA1* in cones of striped sea bass [54] indicating a plasticity in cell type assignment of CNG genes in different species of teleost fish. Furthermore, the analysis in zebrafish also shows specialization into different cone subtypes where *cngb1b* and *cngb3.2* are expressed in UV and blue cones; *cnga3a* is expressed in UV, blue, red and green cones; *cnga3b* and *cngb3.1* are mainly expressed in double, red and green cones (see Fig 10 based on clustering data from [58], for a summary). In addition, they observed a dorsal enrichment of expression of *cnga3a* [58], like what we have observed in previous studies of the transducin subunit genes, *gnb3b* and *gngt2b* [11]. When we interrogated a developing zebrafish scRNA-seq atlas [59] for CNG genes, we could observe that all but *cnga2a*, *cnga2b* and *cnga4* were specific for photoreceptor cells, *cnga2a* did not show any expression and the others were expressed in olfactory neurons.

To conclude, expression data from non-bilateria animals suggest that the formation of heterotetrameric channels in adults could be specific for cnidarians and bilaterians, possibly because of the presence of a nervous system of shared origin or the presence of a more complex nervous system in these lineages that require more fine-tuned modulation, something a more diverse pool of subunits would allow. Data from the tunicate *Ciona intestinalis* support a

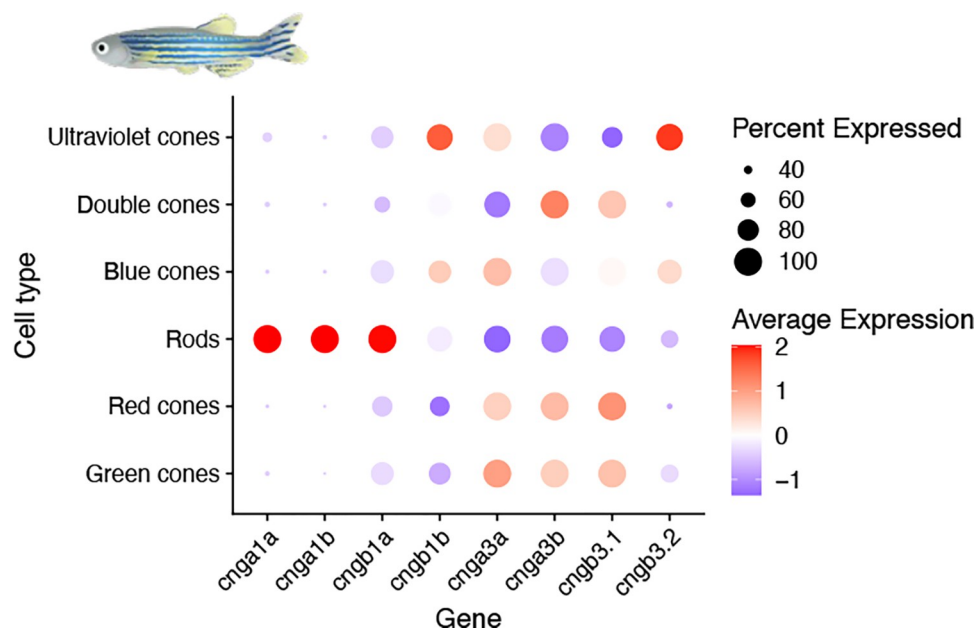

**Fig 10. CNG gene expression data from zebrafish.** Dot plot of the expression of zebrafish visual CNG genes in photoreceptor cell types in the retina. This data show that further specialization has occurred after the teleost-specific 3R event. Illustration of zebrafish was kindly provided by Dr. Daniel Ocampo Daza.

<https://doi.org/10.1371/journal.pone.0279548.g010>

hypothesis of channel composition that is not the traditional vertebrate CNGA-CNGB type channel, but rather a CNGA-CNGD channel in our lineage, the chordates, in some neural cell types. Data from sponge and tunicates also suggest that CNGB might be able to form a functional homotetrameric channel at least outside of vertebrates. This together with the findings of several novel CNG genes invite more detailed studies to determine the function and subunit composition of channels related to these newly identified genes as well as their expression in various metazoan lineages. The analyses presented here reveals an ancient complexity of CNG channel genes that was reduced before the appearance of vertebrates. The two gene repertoire in the vertebrate ancestor was re-expanded to the six genes in the cyclostome and gnathostome ancestors, facilitating the differentiation of expression between cones, rods and other CNS functions. Furthermore, specializations in the teleost retina have been facilitated by retention of duplicates from mainly WGD events—adding further evidence for the important role of WGDs in eye evolution.

## Materials and methods

### Sequence identification and collection in chordates

Amino acid sequences of the CNGA and CNGB gene families from the species listed in [S1 Table](#) were downloaded from Ensembl (version 68) [60] and, when needed, updated to newer versions (see [61] for latest Ensembl paper). TBLASTN and BLASTP [62] searches either at Ensembl or NCBI were used to identify gene sequences that were missing in certain species. Additional sequences from other species were sometimes included to fill in gaps in the representation, for information about this see [S1 Table](#). Identified genes that lacked annotation in the Ensembl genome browser were either annotated manually, by following sequence homology and splice donor/acceptor sites, or using gene prediction software like Augustus (3.2.2) [63,64] or the GENSCAN [65] web server available at: <http://genes.mit.edu/GENSCAN.html>.

Tables listing Ensembl gene IDs, Ensembl transcript IDs and the genomic locations of the *CNGA* and *CNGB* genes used are provided in [S1 Table](#).

### Identification of CNG genes in actinopterygian fish

The human *CNGA4* amino acid sequence was used in a BLASTP search against the RefSeq protein database at NCBI with standard settings. All hit sequences (4063) were retrieved and subjected to a BLASTP search against the human proteome using BLAST+ 2.6.0 with `-max_target_seqs "1"` and standard settings. Sequences that had a *CNGA* or *CNGB* gene as a best hit in the BLASTP search, were collected. Gene ID information for each protein sequence ID was downloaded from NCBI and each set of sequences was subjected to IsoSel [66] to extract the best transcript from each gene. The filtered output files were aligned using ClustalO [67] and the resulting alignments were inspected manually. The sequences that were too short (under one third of the average length of the sequences in the alignment), aligned poorly or appeared to belong to another gene family were removed from the analysis. Sequences labelled as "LOW QUALITY PROTEIN" (54 out of 870 of the *CNGA* sequences and 45 out of 491 of the *CNGB* sequences) were included in the analysis even though they might be pseudogenes, this since we wanted to disentangle the modes of duplication in this gene family and exclusion of these might have hidden duplications that have been lost to pseudogenization.

A time-calibrated phylogeny for all species included in the final actinopterygian fish CNG alignments was downloaded from [timetree.org](http://timetree.org), only species that had this information available were included [68]. The final counts of sequences were mapped to this species phylogeny using iTOL [69].

### Identification of *CNGA* and *CNGB* genes in non-vertebrate eukaryotes

Human *CNGA4*, *CNGA3* and *CNGB1* amino acid sequences were used as queries in BLASTP searches against the NCBI nr database in metazoans, vertebrates excluded, with standard settings. All hit sequences were downloaded and used in a reciprocal BLASTP searches against the human proteome using BLAST+ 2.9.0 with `-max_target_seqs "1"` and standard settings. Sequences that had any CNG sequence as a best hit, i.e., putative CNGs, were then subjected to CD-HIT 4.8.1 [70,71] to remove duplicated sequences or alternative transcripts (designated as  $\geq 95\%$  sequence identity). The resulting consensus sequences were then subjected to a domain search using hmmscan 3.3.2 against the PfamA database.

Sequences with a similar domain architecture as the human *CNGA* proteins (with domains Ion\_trans and cNMP\_binding with e-values  $<0.01$ ) were collected and added to the main family alignment of *CNGA*. An additional BLASTP search against the human proteome was performed to identify sequences that had something other than a CNG sequence among the top five hits, these sequences were excluded from the analysis. The sequences were trimmed as described in the alignment section. Sequences shorter than one third of the average length of the sequences in the main family alignment were removed. The resulting FASTA file was aligned as described in the multiple sequence alignment section and a phylogenetic tree was constructed as described in the phylogenetic analyses section.

Sequences with a cNMP\_binding domain with an evalue  $<0.01$  and that had *CNGB* as the highest hit in the reciprocal BLASTP search against the human proteome using BLAST+ 2.9.0 with `-max_target_seqs "1"` and standard settings, were added to the main family alignment of *CNGB*. The sequences were trimmed as described in the alignment section. Sequences shorter than one third of the average length of the sequences in the main family alignment were removed. The resulting FASTA file was aligned as described in the multiple sequence alignment section and a phylogenetic tree was constructed as described in the phylogenetic analyses section.



Sequences labelled as “LOW QUALITY PROTEIN” (19 out of 911 of the *CNGA* sequences and 0 out of 379 of the *CNGB* sequences) were included in the analysis even though they might be pseudogenes, this since we wanted to disentangle the modes of duplication in this gene family and exclusion of these might have duplications that have been lost to pseudogenization.

In addition, a BLASTP search was performed against the nr database using the same sequences, against all eukaryotes, with metazoans excluded. Sequences that had any CNG sequence as best was then subjected to CD-HIT 4.8.1 [70,71] to remove duplicate sequences or alternative transcripts (designated as  $\geq 95\%$  sequence identity). The resulting consensus sequences were then subjected to a domain search using hmmscan 3.3.2 against the PfamA database. Hmmscan results were then investigated for sequences with the CLZ domain.

Finally, NCBI protein IDs were used to retrieve NCBI taxonomy identifiers to identify which eukaryote groups that have either putative *CNGA* gene or putative *CNGB* genes or both.

### Multiple sequence alignments

Amino acid sequences collected from the *CNGA* and *CNGB* families, as well as from the identified neighboring gene families, were placed in gene family specific FASTA files and aligned using ClustalO [67] with standard settings. Alignments were inspected and sequences edited manually where necessary. Incomplete sequences of vertebrate sequences were either extended manually if possible or removed from the alignment if they were shorter than one third of the average length of the sequences in the alignment. The *CNGA* sequences in the main family alignment were trimmed in the beginning right up to the human *CNGA1* “VVID” motif and after the “EYPD” motif in the same sequence. The *CNGB* sequences in the main family alignment were trimmed until the “NLMY” motif in human *CNGB1* and after the “GTPK” motif in the same sequence. The trimming was done to remove the variable N and C terminal regions that are often missing and/or difficult to manually extend.

### Phylogenetic analyses

Alignments for all families except for the metazoan *CNGA* sequences were used for substitution model prediction and phylogenetic tree reconstructions using a local installation of IQ-TREE using aLRT and ultra-fast bootstrapping [72–74]. The following settings were used: -t BIONJ -quiet -keep-ident -bb 10000 -alrt 10000 -m TEST. For the metazoan *CNGA* sequences, the Galaxy [75] server (<https://usegalaxy.eu>) was used to run IQ-TREE using standard settings and -m TEST as well as -bb 10000 and -alrt 10000.

The resulting ML trees were rooted with nw\_reroot from Newick utilities [76] and displayed using ggtree R package [77] or rooted and displayed using iTOL [69] (available at <https://itol.embl.de>). Nodes considered well supported were labelled with a filled red circle with the criteria  $\geq 80\%$  aLRT and  $\geq 95\%$  Ufbootstrap support (based on the IQ-TREE manual), for all trees except for the metazoan *CNGA* tree. The trees of the actinopterygian fish CNG sequences were either rooted with the *CNGA4* sequences (*CNGA* tree) or rooted by one of the subtype clades (*CNGB* tree). The metazoan *CNGA* the tree shown, is the consensus tree and the node support with  $\geq 90\%$  are labelled with a filled red circle.

### Comparative synteny analysis of the bony vertebrate *CNGA* and *CNGB* regions

Lists of genes located in regions 5 mega base pairs (Mb) upstream and downstream of the spotted gar (*LepOcu1* assembly) *CNGA* genes were retrieved from Ensembl (version 74). *CNGA3*

and *CNGA4* are located so close to each other on LG17 in spotted gar that the 5 Mb regions overlap. In this case therefore, a region 5 Mb upstream of one and 5 Mb downstream of the other gene were used in the selections of neighboring gene families. Genes belonging to Ensembl protein families with members on all three of the CNGA carrying spotted gar linkage groups were selected for further phylogenetic analysis (see S1-S7 Figs in [S1 File](#) for the phylogenetic trees). For the CNGB genes lists of genes located in regions of 10 Mb upstream and downstream of the spotted gar CNGB genes were retrieved. Genes belonging to Ensembl protein families with members on both CNGB carrying spotted gar linkage groups were selected for further phylogenetic analysis (see S8-S17 Figs in [S1 File](#) for phylogenetic trees).

### Comparative synteny analysis of the elasmobranch *CNGA* and *CNGB* regions

Amino acid sequences from annotations of the small-spotted catshark were compared to the amino acid sequences of spotted gar using Proteinortho [78] at the Galaxy [75] server (<https://usegalaxy.eu>). Tables containing the spotted gar gene and its small-spotted catshark ortholog were made and they were colored based on spotted gar chromosome. If a spotted gar gene seemed to be missing, we performed best reciprocal BLASTP searches to identify the missing genes. The data for the small-spotted catshark can be accessed through NCBI BioProject: PRJEB35945.

### CNG gene expression

The DotPlot showing the expression of phototransduction specific CNG genes in zebrafish photoreceptors is based on GEO data from Ogawa and Corbo (2020) (gene expression omnibus accession number GSE175929). The figure shows the same data shown in their [Fig 3C](#) but plotted differently for clarity using Seurat v4 [79]. The information about the expression of phototransduction specific CNG genes from zebrafish cells during development were retrieved from the following website: <http://zebrafish-dev.cells.ucsc.edu> based on analyses from [59]. Expression data from *Ciona intestinalis* larval central nervous system was retrieved from [https://singlecell.broadinstitute.org/single\\_cell/study/SCP454/comprehensive-single-cell-transcriptome-lineages-of-a-proto-vertebrate](https://singlecell.broadinstitute.org/single_cell/study/SCP454/comprehensive-single-cell-transcriptome-lineages-of-a-proto-vertebrate) [80]. Data from non-bilaterian metazoans were retrieved from [https://tanaylab.github.io/old\\_resources/](https://tanaylab.github.io/old_resources/) [40,41].

### Supporting information

**S1 File. File containing all supplementary figs and their descriptions.**  
(PDF)

**S1 Table. Genome assemblies, sequence identifiers and chromosomal locations of the genes included in the phylogenetic analyses of the main and neighboring gene families.**  
NCBI protein accession numbers and species names of actinopterygian fish sequences included in the analyses.  
(XLSX)

**S2 Table. Species, NCBI protein accession number, chromosome, and possible mode of duplication of genes located on the same chromosome within one actinopterygian fish species as well as locations of lamprey CNG hits in species with genome assemblies available on NCBI.**  
(XLSX)

## Acknowledgments

We would like to thank Christina Bergqvist and Jenny Widmark for help with the initial phylogenetic analyses and valuable discussions. We would also like to thank Daniel Ocampo Daza for the animal drawings used in Figs 6B, 6C and 7E.

## Author Contributions

**Conceptualization:** David Lagman, Xesús M. Abalo, Dan Larhammar.

**Data curation:** David Lagman, Helen J. Haines.

**Formal analysis:** David Lagman, Helen J. Haines.

**Funding acquisition:** Xesús M. Abalo, Dan Larhammar.

**Investigation:** David Lagman, Helen J. Haines, Xesús M. Abalo, Dan Larhammar.

**Methodology:** David Lagman.

**Project administration:** Xesús M. Abalo, Dan Larhammar.

**Supervision:** Xesús M. Abalo, Dan Larhammar.

**Visualization:** David Lagman.

**Writing – original draft:** David Lagman.

**Writing – review & editing:** David Lagman, Helen J. Haines, Xesús M. Abalo, Dan Larhammar.

## References

1. Darwin C., *Drawin On the origin of species by means of natural selection*, 1859.
2. Nordström K., Larsson T.A., Larhammar D., Extensive duplications of phototransduction genes in early vertebrate evolution correlate with block (chromosome) duplications, *Genomics*. 83 (2004) 852–872. <https://doi.org/10.1016/j.ygeno.2003.11.008> PMID: 15081115
3. Larhammar D., Nordström K., Larsson T.A., Evolution of vertebrate rod and cone phototransduction genes., *Philos Trans R Soc Lond B Biol Sci*. 364 (2009) 2867–2880. <https://doi.org/10.1098/rstb.2009.0077> PMID: 19720650
4. Lagman D., Daza D.O., Widmark J., Abalo X.M., Sundström G., Larhammar D., The vertebrate ancestral repertoire of visual opsins, transducin alpha subunits and oxytocin/vasopressin receptors was established by duplication of their shared genomic region in the two rounds of early vertebrate genome duplications, *BMC Evol Biol*. 13 (2013) 238. <https://doi.org/10.1186/1471-2148-13-238> PMID: 24180662
5. Lagman D., Sundström G., Ocampo Daza D., Abalo X.M., Larhammar D., Expansion of Transducin Subunit Gene Families in Early Vertebrate Tetraploidizations., *Genomics*. 100 (2012) 203–211. <https://doi.org/10.1016/j.ygeno.2012.07.005> PMID: 22814267
6. Lagman D., Callado-Pérez A., Franzén I.E., Larhammar D., Abalo X.M., Transducin Duplicates in the Zebrafish Retina and Pineal Complex: Differential Specialisation after the Teleost Tetraploidisation, *PLoS One*. 10 (2015) e0121330. <https://doi.org/10.1371/journal.pone.0121330> PMID: 25806532
7. Lagman D., Franzén I.E., Eggert J., Larhammar D., Abalo X.M., Evolution and expression of the phosphodiesterase 6 genes unveils vertebrate novelty to control photosensitivity, *BMC Evol Biol*. 16 (2016) 124. <https://doi.org/10.1186/s12862-016-0695-z> PMID: 27296292
8. Abalo X.M., Lagman D., Heras G., del Pozo A., Eggert J., Larhammar D., Circadian regulation of phosphodiesterase 6 genes in zebrafish differs between cones and rods: Implications for photopic and scotopic vision, *Vision Res*. 166 (2020) 43–51. <https://doi.org/10.1016/j.visres.2019.11.001> PMID: 31855667
9. Amores A., Catchen J., Ferrara A., Fontenot Q., Postlethwait J.H., Genome Evolution and Meiotic Maps by Massively Parallel DNA Sequencing: Spotted Gar, an Outgroup for the Teleost Genome Duplication, *Genetics*. 188 (2011) 799–808. <https://doi.org/10.1534/genetics.111.127324> PMID: 21828280

10. Braasch I., Gehrke A.R., Smith J.J., Kawasaki K., Manousaki T., Pasquier J., et al. Postlethwait, The spotted gar genome illuminates vertebrate evolution and facilitates human-teleost comparisons, *Nat Genet.* 48 (2016) 427–437. <https://doi.org/10.1038/ng.3526>.
11. Kasahara M., Naruse K., Sasaki S., Nakatani Y., Qu W., Ahsan B., et al. The medaka draft genome and insights into vertebrate genome evolution., *Nature.* 447 (2007) 714–9. <https://doi.org/10.1038/nature05846> PMID: 17554307
12. Jaillon O., Aury J.-M., Brunet F., Petit J.-L., Stange-Thomann N., Mauceli E., et al. Genome duplication in the teleost fish *Tetraodon nigroviridis* reveals the early vertebrate proto-karyotype., *Nature.* 431 (2004) 946–57. <https://doi.org/10.1038/nature03025> PMID: 15496914
13. Lamb T.D., Evolution of the genes mediating phototransduction in rod and cone photoreceptors, *Prog Retin Eye Res.* 76 (2019) 100823. <https://doi.org/10.1016/j.preteyeres.2019.100823> PMID: 31790748
14. Lamb T.D., Hunt D.M., Evolution of the vertebrate phototransduction cascade activation steps, *Dev Biol.* 431 (2017) 77–92. <https://doi.org/10.1016/j.ydbio.2017.03.018> PMID: 28347645
15. Okano T., Kojima D., Fukada Y., Shichida Y., Yoshizawa T., Primary structures of chicken cone visual pigments: vertebrate rhodopsins have evolved out of cone visual pigments., *Proc Natl Acad Sci U S A.* 89 (1992) 5932–6. <http://www.pubmedcentral.nih.gov/articlerender.fcgi?artid=402112&tool=pmcentrez&rendertype=abstract>. <https://doi.org/10.1073/pnas.89.13.5932> PMID: 1385866
16. Lamb T.D., Evolution of phototransduction, vertebrate photoreceptors and retina., *Prog Retin Eye Res.* 36 (2013) 52–119. <https://doi.org/10.1016/j.preteyeres.2013.06.001> PMID: 23792002
17. Lamb T.D., Photoreceptor physiology and evolution: cellular and molecular basis of rod and cone phototransduction, *J Physiol.* 0 (2022). <https://doi.org/10.1113/JP282058> PMID: 35412676
18. Peng Y.W., Robishaw J.D., Levine M.A., Yau K.W., Retinal rods and cones have distinct G protein beta and gamma subunits., *Proc Natl Acad Sci U S A.* 89 (1992) 10882–6. <http://www.pubmedcentral.nih.gov/articlerender.fcgi?artid=50446&tool=pmcentrez&rendertype=abstract>. <https://doi.org/10.1073/pnas.89.22.10882> PMID: 1438293
19. Ding X.Q., Matveev A., Singh A., Komori N., Matsumoto H., Biochemical characterization of cone Cyclic Nucleotide-Gated (CNG) channel using the infrared fluorescence detection system, *Adv Exp Med Biol.* 723 (2012) 769–775. [https://doi.org/10.1007/978-1-4614-0631-0\\_98](https://doi.org/10.1007/978-1-4614-0631-0_98) PMID: 22183405
20. Stuart N.G., Haitin Y., Camp S.S., Black K.D., Zagotta W.N., Molecular mechanism for 3:1 subunit stoichiometry of rod cyclic nucleotide-gated ion channels, *Nat Commun.* 2 (2011). <https://doi.org/10.1038/ncomms1466> PMID: 21878911
21. Zheng J., Zagotta W.N., Stoichiometry and assembly of olfactory cyclic nucleotide-gated channels, *Neuron.* 42 (2004) 411–421. [https://doi.org/10.1016/s0896-6273\(04\)00253-3](https://doi.org/10.1016/s0896-6273(04)00253-3) PMID: 15134638
22. Munger S.D., Central Role of the CNGA4 Channel Subunit in Ca<sup>2+</sup>-Calmodulin-Dependent Odor Adaptation, *Science* (1979). 294 (2001) 2172–2175. <https://doi.org/10.1126/science.1063224> PMID: 11739959
23. Podda M.V., Grassi C., New perspectives in cyclic nucleotide-mediated functions in the CNS: The emerging role of cyclic nucleotide-gated (CNG) channels, *Pflugers Arch.* 466 (2014) 1241–1257. <https://doi.org/10.1007/s00424-013-1373-2> PMID: 24142069
24. Brams M., Kusch J., Spurny R., Benndorf K., Ulens C., Family of prokaryote cyclic nucleotide-modulated ion channels, *Proc Natl Acad Sci U S A.* 111 (2014) 7855–7860. <https://doi.org/10.1073/pnas.1401917111> PMID: 24821777
25. Plachetzki D.C., Fong C.R., Oakley T.H., The evolution of phototransduction from an ancestral cyclic nucleotide gated pathway., *Proceedings. Biological Sciences / The Royal Society.* 277 (2010) 1963–9. <https://doi.org/10.1098/rspb.2009.1797>.
26. Plachetzki D.C., Fong C.R., Oakley T.H., Cnidocyte discharge is regulated by light and opsin-mediated phototransduction, *BMC Biol.* 10 (2012). <https://doi.org/10.1186/1741-7007-10-17> PMID: 22390726
27. Baumann A., Frings S., Godde M., Seifert R., Kaupp U.B., Primary structure and functional expression of a *Drosophila* cyclic nucleotide-gated channel present in eyes and antennae, *EMBO Journal.* 13 (1994) 5040–5050. <https://doi.org/10.1002/j.1460-2075.1994.tb06833.x> PMID: 7957070
28. Achim K., Eling N., Vergara H.M., Bertucci P.Y., Musser J., Vopalensky P., et al. Whole-body single-cell sequencing reveals transcriptional domains in the annelid larval body, *Mol Biol Evol.* 35 (2018) 1047–1062. <https://doi.org/10.1093/molbev/msx336> PMID: 29373712
29. Abitua P.B., Gainous T.B., Kaczmarczyk A.N., Winchell C.J., Hudson C., Kamata K., et al. The pre-vertebrate origins of neurogenic placodes, *Nature.* 524 (2015) 462–465. <https://doi.org/10.1038/nature14657> PMID: 26258298
30. Kohl S., Baumann B., Broghammer M., Jägle H., Sieving P., Kellner U., et al. Mutations in the CNGB3 gene encoding the beta-subunit of the cone photoreceptor cGMP-gated channel are responsible for

- achromatopsia (ACHM3) linked to chromosome 8q21., *Hum Mol Genet.* 9 (2000) 2107–2116. <https://doi.org/10.1093/hmg/9.14.2107> PMID: 10958649
31. Sundin O.H., Yang J.M., Li Y., Zhu D., Hurd J.N., Mitchell T.N., et al, Genetic basis of total colourblindness among the Pingelapese islanders, *Nat Genet.* 25 (2000) 289–293. <https://doi.org/10.1038/77162> PMID: 10888875
  32. Sacks O., *The Island of the Colorblind*, A.A. Knopf, 1997.
  33. Remmer M.H., Rastogi N., Ranka M.P., Ceisler E.J., Achromatopsia: A review, *Curr Opin Ophthalmol.* 26 (2015). <https://doi.org/10.1097/ICU.000000000000189> PMID: 26196097
  34. Felden J., Baumann B., Ali M., Audo I., Ayuso C., Bocquet B., et al, Mutation spectrum and clinical investigation of achromatopsia patients with mutations in the GNAT2 gene, *Hum Mutat.* 40 (2019). <https://doi.org/10.1002/humu.23768> PMID: 31058429
  35. Musilova Z., Salzburger W., Cortesi F., The Visual Opsin Gene Repertoires of Teleost Fishes: Evolution, Ecology, and Function, *Annu. Rev. Cell Dev. Biol.* 2021. 37 (2021) 441–468. <https://doi.org/10.1146/annurev-cellbio-120219-024915> PMID: 34351785
  36. Lamb T.D., Patel H., Chuah A., Natoli R.C., Davies W.I.L., Hart N.S., et al, Evolution of vertebrate phototransduction: cascade activation, *Mol Biol Evol.* 33 (2016) 2064–2087. <https://doi.org/10.1093/molbev/msw095> PMID: 27189541
  37. Ocampo Daza D., Sundström G., Bergqvist C.A., Larhammar D., The evolution of vertebrate somatostatin receptors and their gene regions involves extensive chromosomal rearrangements., *BMC Evol Biol.* 12 (2012) 231. <https://doi.org/10.1186/1471-2148-12-231> PMID: 23194088
  38. Lien S., Koop B.F., Sandve S.R., Miller J.R., Kent M.P., Nome T., et al, The Atlantic salmon genome provides insights into rediploidization, *Nature.* 533 (2016) 200–205. <https://doi.org/10.1038/nature17164> PMID: 27088604
  39. Sävillammi T., Primmer C.R., Varadharajan S., Guyomard R., Guiguen Y., Sandve S.R., et al, The chromosome-level genome assembly of european grayling reveals aspects of a unique genome evolution process within salmonids, *G3: Genes, Genomes, Genetics.* 9 (2019) 1283–1294. <https://doi.org/10.1534/g3.118.200919>.
  40. Sebé-Pedrós A., Chomsky E., Pang K., Lara-Astiaso D., Gaiti F., Mukamel Z., et al, Early metazoan cell type diversity and the evolution of multicellular gene regulation, *Nat Ecol Evol.* 2 (2018). <https://doi.org/10.1038/s41559-018-0575-6> PMID: 29942020
  41. Sebé-Pedrós A., Saudemont B., Chomsky E., Plessier F., Mailhé M.P., Renno J., et al, Cnidarian Cell Type Diversity and Regulation Revealed by Whole-Organism Single-Cell RNA-Seq, *Cell.* 173 (2018). <https://doi.org/10.1016/j.cell.2018.05.019> PMID: 29856957
  42. Sachkova M.Y., Nordmann E.L., Soto-Ángel J.J., Meeda Y., Górski B., Naumann B., et al, Neuropeptide repertoire and 3D anatomy of the ctenophore nervous system, *Current Biology.* 31 (2021). <https://doi.org/10.1016/j.cub.2021.09.005> PMID: 34587474
  43. Nakatani Y., Takeda H., Kohara Y., Morishita S., Reconstruction of the vertebrate ancestral genome reveals dynamic genome reorganization in early vertebrates., *Genome Res.* 17 (2007) 1254–65. <https://doi.org/10.1101/gr.6316407> PMID: 17652425
  44. Sacerdot C., Louis A., Bon C., Roest Crolius H., Chromosome evolution at the origin of the ancestral vertebrate genome, *BioRxiv.* (2018) 1–15. <https://doi.org/10.1186/s13059-018-1559-1> PMID: 30333059
  45. Lamb T.D., Analysis of Paralogons, Origin of the Vertebrate Karyotype, and Ancient Chromosomes Retained in Extant Species, *Genome Biol Evol.* 13 (2021). <https://doi.org/10.1093/gbe/evab044> PMID: 33751101
  46. Nakatani Y., Shingate P., Ravi V., Pillai N.E., Prasad A., McLysaght A., et al, Reconstruction of proto-vertebrate, proto-cyclostome and proto-gnathostome genomes provides new insights into early vertebrate evolution, *Nat Commun.* 12 (2021) 1–14. <https://doi.org/10.1038/s41467-021-24573-z>.
  47. Sundström G., Dreborg S., Larhammar D., Concomitant Duplications of Opioid Peptide and Receptor Genes before the Origin of Jawed Vertebrates, *PLoS One.* 5 (2010) e10512. <https://doi.org/10.1371/journal.pone.0010512> PMID: 20463905
  48. Dreborg S., Sundström G., Larsson T.A., Larhammar D., Evolution of vertebrate opioid receptors., *Proc Natl Acad Sci U S A.* 105 (2008) 15487–92. <https://doi.org/10.1073/pnas.0805590105> PMID: 18832151
  49. Musilova Z., Salzburger W., Cortesi F., The Visual Opsin Gene Repertoires of Teleost Fishes: Evolution, Ecology, and Function, *Annu Rev Cell Dev Biol.* 37 (2021) 441–468. <https://doi.org/10.1146/annurev-cellbio-120219-024915>.



50. Chen T.Y., Peng Y.W., Dhallan R.S., Ahamed B., Reed R.R., Yau K.W., A new subunit of the cyclic nucleotide-gated cation channel in retinal rods, *Nature*. 362 (1993). <https://doi.org/10.1038/362764a0> PMID: 7682292
51. Körschen H.G., Illing M., Seifer R., Sesti F., Williams A., Gotzes S., et al A 240 kDa protein represents the complete  $\beta$  subunit of the cyclic nucleotide-gated channel from rod photoreceptor, *Neuron*. 15 (1995). [https://doi.org/10.1016/0896-6273\(95\)90151-5](https://doi.org/10.1016/0896-6273(95)90151-5).
52. Plachetzki D.C., Fong C.R., Oakley T.H., Cnidocyte discharge is regulated by light and opsin-mediated phototransduction, *BMC Biol.* 10 (2012). <https://doi.org/10.1186/1741-7007-10-17> PMID: 22390726
53. Lapan S.W., Reddien P.W., Transcriptome Analysis of the Planarian Eye Identifies ovo as a Specific Regulator of Eye Regeneration, *Cell Rep.* 2 (2012). <https://doi.org/10.1016/j.celrep.2012.06.018> PMID: 22884275
54. Paillart C., Zhang K., Rebrik T.I., Baehr W., Korenbrot J.I., Cloning and molecular characterization of cGMP-gated ion channels from rod and cone photoreceptors of striped bass (*M. saxatilis*) retina, *Vis Neurosci.* 23 (2006) 99–113. <https://doi.org/10.1017/S0952523806231092> PMID: 16597354
55. Renninger S.L., Gesemann M., Neuhauss S.C.F., Cone arrestin confers cone vision of high temporal resolution in zebrafish larvae., *Eur J Neurosci.* 33 (2011) 658–67. <https://doi.org/10.1111/j.1460-9568.2010.07574.x> PMID: 21299656
56. Zang J., Keim J., Kastenhuber E., Gesemann M., Neuhauss S.C.F., Recoverin depletion accelerates cone photoresponse recovery, *Open Biol.* 5 (2015) 150086. <https://doi.org/10.1098/rsob.150086> PMID: 26246494
57. Takechi M., Kawamura S., Temporal and spatial changes in the expression pattern of multiple red and green subtype opsin genes during zebrafish development., *J Exp Biol.* 208 (2005) 1337–45. <https://doi.org/10.1242/jeb.01532> PMID: 15781894
58. Ogawa Y., Corbo J.C., Partitioning of gene expression among zebrafish photoreceptor subtypes, *Sci Rep.* (2021) 1–13. <https://doi.org/10.1038/s41598-021-96837-z>.
59. Farnsworth D.R., Saunders L.M., Miller A.C., A single-cell transcriptome atlas for zebrafish development, *Dev Biol.* 459 (2020) 100–108. <https://doi.org/10.1016/j.ydbio.2019.11.008> PMID: 31782996
60. Flicek P., Ahmed I., Amode M.R., Barrell D., Beal K., Brent S., et al, Ensembl 2013, *Nucleic Acids Res.* 41 (2013) 48–55. <https://doi.org/10.1093/nar/gks1236> PMID: 23203987
61. Howe K.L., Achuthan P., Allen J., Allen J., Alvarez-Jarreta J., Ridwan Amode M., et al, Ensembl 2021, *Nucleic Acids Res.* 49 (2021) D884–D891. <https://doi.org/10.1093/nar/gkaa942> PMID: 33137190
62. Altschul S.F., Gish W., Miller W., Myers E.W., Lipman D.J., Basic local alignment search tool., *J Mol Biol.* 215 (1990) 403–10. [https://doi.org/10.1016/S0022-2836\(05\)80360-2](https://doi.org/10.1016/S0022-2836(05)80360-2) PMID: 2231712
63. Stanke M., Steinkamp R., Waack S., Morgenstern B., AUGUSTUS: A web server for gene finding in eukaryotes, *Nucleic Acids Res.* 32 (2004) 309–312. <https://doi.org/10.1093/nar/gkh379>.
64. Stanke M., Gene prediction with a hidden Markov model and a new intron submodel, Georg-August-Universität Göttingen, 2003. [http://www.ncbi.nlm.nih.gov/entrez/query.fcgi?cmd=Retrieve&db=PubMed&dopt=Citation&list\\_uids=14534192](http://www.ncbi.nlm.nih.gov/entrez/query.fcgi?cmd=Retrieve&db=PubMed&dopt=Citation&list_uids=14534192). <https://doi.org/10.1093/bioinformatics/btg1080> PMID: 14534192
65. Burge C., Karlin S., Prediction of Complete Gene Structures in Human Genomic DNA, *J Mol Biol.* 268 (1997) 78–94. <http://linkinghub.elsevier.com/retrieve/pii/S0022283697909517> (accessed June 10, 2011). <https://doi.org/10.1006/jmbi.1997.0951> PMID: 9149143
66. Philippon H., Souvane A., Brochier-Armanet C., Perrière G., IsoSel: Protein Isoform Selector for phylogenetic reconstructions, *PLoS One.* 12 (2017) e0174250. <https://doi.org/10.1371/journal.pone.0174250> PMID: 28323858
67. Sievers F., Wilm A., Dineen D., Gibson T.J., Karplus K., Li W., et al, Fast, scalable generation of high-quality protein multiple sequence alignments using Clustal Omega, *Mol Syst Biol.* 7 (2011). <https://doi.org/10.1038/msb.2011.75> PMID: 21988835
68. Kumar S., Stecher G., Suleski M., Hedges S.B., TimeTree: A Resource for Timelines, Timetrees, and Divergence Times, *Mol Biol Evol.* 34 (2017) 1812–1819. <https://doi.org/10.1093/molbev/msx116> PMID: 28387841
69. Letunic I., Bork P., Interactive tree of life (iTOL) v5: An online tool for phylogenetic tree display and annotation, *Nucleic Acids Res.* 49 (2021) W293–W296. <https://doi.org/10.1093/nar/gkab301> PMID: 33885785
70. Li W., Godzik A., Cd-hit: A fast program for clustering and comparing large sets of protein or nucleotide sequences, *Bioinformatics.* 22 (2006) 1658–1659. <https://doi.org/10.1093/bioinformatics/btl158> PMID: 16731699



71. Fu L., Niu B., Zhu Z., Wu S., Li W., CD-HIT: Accelerated for clustering the next-generation sequencing data, *Bioinformatics*. 28 (2012) 3150–3152. <https://doi.org/10.1093/bioinformatics/bts565> PMID: 23060610
72. Nguyen L.T., Schmidt H.A., von Haeseler A., Minh B.Q., IQ-TREE: A fast and effective stochastic algorithm for estimating maximum-likelihood phylogenies, *Mol Biol Evol*. 32 (2015) 268–274. <https://doi.org/10.1093/molbev/msu300> PMID: 25371430
73. Kalyaanamoorthy S., Minh B.Q., Wong T.K.F., von Haeseler A., Jermiin L.S., ModelFinder: Fast model selection for accurate phylogenetic estimates, *Nat Methods*. 14 (2017) 587–589. <https://doi.org/10.1038/nmeth.4285> PMID: 28481363
74. Hoang D.T., Chernomor O., von Haeseler A., Minh B.Q., Vinh L.S., UFBoot2: Improving the ultrafast bootstrap approximation, *Mol Biol Evol*. 35 (2018) 518–522. <https://doi.org/10.1093/molbev/msx281> PMID: 29077904
75. Afgan E., Baker D., Batut B., van den Beek M., Bouvier D., Ech M., et al, The Galaxy platform for accessible, reproducible and collaborative biomedical analyses: 2018 update, *Nucleic Acids Res*. 46 (2018) W537–W544. <https://doi.org/10.1093/nar/gky379> PMID: 29790989
76. Junier T., Zdobnov E.M., The Newick utilities: high-throughput phylogenetic tree processing in the UNIX shell, *Bioinformatics*. 26 (2010) 1669–1670. <https://doi.org/10.1093/bioinformatics/btq243> PMID: 20472542
77. Yu G., Using ggtree to Visualize Data on Tree-Like Structures, *Curr Protoc Bioinformatics*. 69 (2020) 1–18. <https://doi.org/10.1002/cpbi.96> PMID: 32162851
78. Lechner M., Findeiß S., Steiner L., Marz M., Stadler P.F., Prohaska S.J., Proteinortho: Detection of (Co-)orthologs in large-scale analysis, *BMC Bioinformatics*. 12 (2011) 124. <https://doi.org/10.1186/1471-2105-12-124> PMID: 21526987
79. Hao Y., Hao S., Andersen-Nissen E., Mauck W.M., Zheng S., Butler A., et al, Integrated analysis of multimodal single-cell data, *Cell*. 184 (2021) 3573–3587.e29. <https://doi.org/10.1016/j.cell.2021.04.048> PMID: 34062119
80. Cao C., Lemaire L.A., Wang W., Yoon P.H., Choi Y.A., Parsons L.R., et al, Comprehensive single-cell transcriptome lineages of a proto-vertebrate, *Nature*. 571 (2019) 349–354. <https://doi.org/10.1038/s41586-019-1385-y> PMID: 31292549
